1           **MR relaxometry-based analysis of brain hemorrhages: an**  
2                           **experimental study on a rabbit model**

3  
4                           **MR Relaxometry and brain hemorrhages**

5  
6           **Francesca Del Signore<sup>1</sup>, Massimo Vignoli<sup>1</sup>, Leonardo Della Salda<sup>1\*</sup>, Roberto Tamburro<sup>1</sup>,**  
7                           **Ilaria Cerasoli<sup>2</sup>, Andrea Paolini<sup>1</sup>, Mariarita Romanucci<sup>1</sup>, Francesco de Pasquale<sup>1</sup>.**

8  
9           <sup>1</sup> **Veterinary Faculty, University of Teramo, Teramo, Italy**

10           <sup>2</sup>**Clinica Veterinaria Borghesiana, Rome, Italy**

11  
12           **\*Corresponding author**

13           **Email: [ldellasalda@unite.it](mailto:ldellasalda@unite.it) (LDS)**

## 25 **Abstract**

26 Magnetic Resonance Relaxometry is a quantitative MRI-based technique able to estimate tissue  
27 relaxation times T1 and T2. This approach allows increasing the MRI diagnostic accuracy mostly in  
28 case of brain neoplasia or neurodegenerative disorders in human medicine. However, few reports are  
29 available on the application of this technique in the clinical field of veterinary medicine. For this  
30 reason, in this work, we developed a relaxometry based approach on experimentally induced brain  
31 hemorrhages on rabbits. Specifically, the methodology is based on a hierarchical clustering procedure  
32 driven by the T1 relaxometry signals from a set of regions of interest selected on the T2 map. The  
33 approach is multivariate since it combines both T1 and T2 information and allows the diagnosis at  
34 the subject level by comparing “suspected” pathological regions with healthy homologous ones  
35 within the same brain.

36 To validate the proposed technique, the scanned brains underwent histopathological analyses to  
37 estimate the performance of the proposed classifier in terms of Receiver Operator Curve analyses.  
38 The results showed that, in terms of identification of the lesion and its contours, the proposed  
39 approach resulted accurate and outperformed the standard techniques based on T1w and T2w images.  
40 Finally, since the proposed protocol in terms of the adopted scanner, sequences, and analysis tools,  
41 is suitable for the clinical practice, it can be potentially validated through large-scale multi-center  
42 clinical studies.

43

## 44 **Introduction**

45 Magnetic Resonance Imaging (MRI) is considered the gold standard imaging technique to investigate  
46 encephalic disorders in companion animals [1,2]. However, the images' evaluation is typically  
47 qualitative since MRI provides signals only weighted on the actual tissue longitudinal (T1) and  
48 transverse (T2) relaxation times. To overcome this limitation and to obtain more objective  
49 information on the structure and function of the tissues under investigation, it has been developed a  
50 technique called MR-Relaxometry (MRR) able to provide maps of the actual T1 and T2 [3,4].  
51 Although the intricate relationships linking the tissue microstructure to these relaxation times remain  
52 to be firmly established, their quantitative measurement can be informative of disease-related tissue  
53 change, developmental plasticity, and other biological processes. Therefore, MRR studies potentially  
54 offer a more detailed tissue characterization as compared to conventional ones [3,4].

55 In human medicine, the MRR role has been thoroughly investigated, for example in brain neoplasia,  
56 where this technique improved the lesion identification, especially when monitoring the  
57 chemotherapy response [5–9]. Many reports are also available on the application of this technique on  
58 epileptic patients, with the result of optimizing and enhancing lesion depiction [10,11,11–15]. In the  
59 case of neurodegenerative disorders, MRR resulted useful to improve the detection of early  
60 degeneration areas [16–18]. Additional examples and a general review of this technique can be found  
61 in [3,4].

62 As far as it concerns Relaxometry applications on animal models, most studies have been performed  
63 on rats, mainly on neoplasia [6,19,20]. Further, MRR has been useful in characterizing the  
64 hippocampal involvement in epileptic patients [21] and to detect spontaneous brain hemorrhages [22].  
65 However, most of the animal studies lack an accurate histopathological validation and are typically  
66 performed with high field scanners characterized by a high spatial and signal-to-noise-ratio (SNR)  
67 [21]. On the one hand, this allows us to achieve a higher spatial resolution and signal-to-noise ratio  
68 (SNR). On the other hand, translating such protocols in the clinical field might not be straightforward

69 since nowadays, mainly low field scanners, characterized by a low spatial resolution and SNR, are  
70 available in veterinary facilities [23]. Typically, the diagnosis is based on standard T1w/T2w images  
71 and small lesions can be missed. Further, it often strongly relies on the radiologist's experience, e.g.  
72 in case of subtle lesions, hepatic encephalopathy, distemper encephalitis, or small hemorrhages  
73 [24,25]. To overcome these limitations, in the clinical field, an advanced MRR based tool, as long as  
74 compatible with a low field scanner equipment, could be helpful, as shown in [22]. In this preliminary  
75 study, we showed the potentiality of a relaxometry protocol implemented on a 0.25 T scanner and  
76 tested on phantom and real data from a healthy dog [22]. Here, we built upon those results to focus  
77 on experimentally induced hemorrhages on rabbit brains. This model allows to work with brains  
78 whose size is similar to canine and feline species so that the developed protocol might be translated  
79 to these species. Further, smaller brain animals were excluded due to the resulting prohibitive SNR  
80 of the adopted MR scanner.

81 The developed approach can be summarized as follows. First, a set of regions of interest were selected  
82 based on a T2 map. Second, a hierarchical clustering, driven by the T1 relaxation patterns of the  
83 selected regions, compared the selected regions with the healthy homologous ones and classified the  
84 tissues under investigation. Finally, the performance of the proposed classifier was assessed through  
85 the comparison with histopathological examinations of the brains under investigation.

86

## 87 **Materials and methods**

88

### 89 **Cerebral hemorrhage model in rabbits**

90 Sixteen New Zealand White male rabbits (*O. Cuniculus*) ( $3.2 \pm 0.5$  kg) were included in this study,  
91 that has been carried out in strict accordance with the recommendation from national committee for  
92 animal welfare, with the procol N° 726/2019-PR; all the subjects received continuous proper care  
93 according to national guidelines under the supervision of trained personal.

94 Eight hours before the procedure, each rabbit received meloxicam ( $1,5 \text{ mg kg}^{-1}$ ) (Metacam,  $1,5$   
95 mg/ml, Boehringer Ingelheim Div. Veter) intramuscular (IM) to obtain multimodal analgesia  
96 integrated with morphine ( $1 \text{ mg kg}^{-1}$ ) (morphine chloride,  $10 \text{ mg/mL}$ , S.A.L.F. S.p.a) and midazolam  
97 ( $0,5 \text{ mg kg}^{-1}$ ) (Dormicum®,  $5 \text{ mg/ml}$ , Roche Pharma, Switzerland) for IM premedication before the  
98 start of the procedure. Sixty minutes before applying auricular venous and arterial catheter ( $22 -24 \text{ G}$   
99  $2,5 \text{ cm}$ ) to properly administer fluids and drugs as needed, and measure blood pressure respectively,  
100 each rabbit received topic administration of EMLA cream 5% ® (Aspen Pharma Trading Limited).

101 Induction has been performed with alfaxalone ( $1-4 \text{ mg kg}^{-1}$ ) (Alfaxan®,  $10 \text{ mg/ml}$ , Jurox, UK)  
102 intravenous (IV) and general anesthesia was maintained with isoflurane in oxygen 100% after  
103 applying a cuffed orotracheal tube ( $2-3-5 \text{ mm ID}$ ) under endoscopic guidance.

104 The rabbit cerebral hemorrhaged model was established by autologous blood injection method, with  
105  $0.15 \text{ ml}$  of blood extracted from the auricular vein. The rabbit was placed in sternal recumbency; a  
106  $1.5 \text{ cm}$  midline sagittal skin incision was performed with a #10 scalpel blade and the subcutaneous  
107 tissue was dissected to visualize the brain “cross stitch” intersection that was set as the starting point.  
108 A  $2.0 \text{ mm}$  bone defect was manually performed on the left calvarium with a Synthes-Colibri 2 surgical  
109 drill using a Synthes drill bit diameter  $2.0 \text{ mm}$ . The drilling starting point was  $3-5 \text{ mm}$  to the left of  
110 the coronal suture and caudal to the sagittal suture [26] (Fig 1). The drilling was perpendicularly  
111 oriented to the parietal bone surface. A stopper was applied  $4 \text{ mm}$  below the tip of the drill bit to

112 avoid any potential brain damage. Then the blood was manually injected into the left hemisphere of  
113 each subject with a 1 ml syringe and a 25 G- 1.6 cm needle perpendicularly oriented to the parietal  
114 bone surface to compare the two hemispheres in the same acquisition.

115

### 116 **Fig 1. Technical procedure to induce hemorrhages**

117 A) The brain “cross stitch” used as an anatomic landmark (black arrow).

118 B) The 2-mm diameter hole performed with a surgical drill 3-5 mm caudally and on the left of  
119 the coronal suture.

120 C) The final location to inject the autologous blood and induce the cerebral hemorrhage.

121

122 Then the rabbit was carefully moved to the MR scanner. After the MR acquisitions, each subject has  
123 been euthanized according to national guidelines, and brains were promptly fixed in 10% neutral  
124 buffered formalin for histopathological investigations (see below).

125

### 126 **MRI acquisition and relaxometry protocol**

127 Thirteen out of sixteen subjects were included in the study since three rabbits died.

128 MR data were acquired using an Esaote Vetscan Grande scanner operating at 0.25 T equipped with a

129 Coil 4 (Esaote S.P.A, Genova, Italy). The conventional data consisted of Spin Echo (SE) T1w and

130 Fast SE T2w sequences on transverse and sagittal planes, see Table 1 for the adopted parameters.

131

132

133

134

135

136

137

138 **Table 1. MRI acquisition parameters**

139

|                        | <b>T1w</b>        | <b>T2w</b>        | <b>T2w</b>      |
|------------------------|-------------------|-------------------|-----------------|
|                        | <b>Transverse</b> | <b>Transverse</b> | <b>Sagittal</b> |
| <b>TR</b>              | 400 ms            | 2660 ms           | 2170 ms         |
| <b>TE</b>              | 18 ms             | 100 ms            | 100 ms          |
| <b>Slice thickness</b> | 3 mm              | 3 mm              | 3 mm            |
| <b>Gap</b>             | 0 mm              | 0 mm              | 0 mm            |

140

141 Settings for T1w -T2 w transverse and T2 w sagittal sequences.

142

143 Based on these acquired images, a single transverse brain slice was selected to perform both T1 and  
144 T2 relaxometry. This slice was selected to contain the suspected localization of the lesion in the  
145 transverse plane. When the lesion was not clearly identifiable in this plane, sagittal sequences were  
146 used to localize the lesion.

147 T1 Relaxometry data were acquired through an ad-hoc protocol based on repeated acquisitions of SE  
148 T1w images corresponding to a variable TR, namely TR = [50 120 200 300 400 500 600 650 750 850  
149 900 950 1000] ms. This set of values has been optimized in a previous study [22]. As far as it regards  
150 T2 relaxometry data these were obtained by acquiring FSE T2w images repeatedly acquired with a  
151 variable TE, namely TE = [28 75 136] ms.

152 To account for small head movements during the acquisition, all the acquired images were co-  
153 registered to the T1w ones, through an affine transformation using a standard approach, see for  
154 example [27]. For this reason, in what follows all the acquired images and related results, such as  
155 T1/T2 maps and clustering results, will result aligned in the same subject space.

156 The complete acquisition procedure lasted about 45 minutes on every subject.

## 157 **Analysis pipeline**

158 The proposed approach consists of a multivariate classification procedure that combines both the  
159 information from T1 and T2 relaxation times. The analysis pipeline is schematized in S1 Fig.

160

### 161 **Estimation of T1 and T2 maps**

162 To estimate T1/T2 maps the acquired MR signals were fitted through a two-parameter model using  
163 an unconstrained minimization algorithm based on a derivative-free method [28,29]. Then, for each  
164 patient, from the obtained T2 maps a set of  $n$  voxels, representing ROIs of suspected lesions, were  
165 manually selected by an expert radiologist (S1A Fig). The value of  $n$  was variable depending on the  
166 extension of the suspected lesion. Then, based on the location of the brain midline, the algorithm, in  
167 the contralateral hemisphere, automatically extracted additional  $n$  voxels corresponding regions  
168 homologous to the ones selected (S1A Fig). The set of  $2n$  voxels will represent the input of the  
169 classification algorithm. This allowed us to compare the selected ROIs with their homolog ones to  
170 obtain subject-specific results avoiding the normalization into an average-based brain template.

171

### 172 **Hierarchical clustering**

173 To detect the hemorrhagic vs healthy tissues a hierarchical clustering, driven by the T1 relaxometry  
174 patterns (S1B Fig), was employed (S1C Fig). Other possible clustering techniques could have been  
175 adopted, but the hierarchical clustering has the advantage, e.g. as compared to K-means clustering,  
176 that the number of classes does not need to be specified in advance and the progression of the  
177 clustering can be evaluated at different levels.

178 The basic idea is that hemorrhagic tissues will exhibit a different pattern of relaxometry as compared  
179 to healthy ones. At this stage, we decided to use the original relaxometry pattern for every voxel and  
180 not the relaxation times at the previous steps. This makes the classification more robust since it



181 depends on 13 points (the number of TR adopted), and not just 1 as in the case of relaxation time,  
182 thus describing more accurately the return of the MR signal to the baseline.  
183 Specifically, the hierarchical clustering was run with the Euclidean distance and an unweighted  
184 average as linkage criterion. The final output of the hierarchical clustering is a dendrogram showing  
185 the hierarchical evolution from a set of completely separated observations to the final single cluster,  
186 (S1C Fig). At this stage, to choose the optimal number of clusters, for every output, we computed the  
187 cluster silhouette [30] Of note, for all the considered rabbits in this study, we obtained the highest  
188 silhouette corresponding to two classes, i.e. a binary classification. Thus, in what follows, the cluster  
189 of voxels whose majority was in the healthy hemisphere was labeled as “healthy” (H) while the other  
190 cluster as “pathological” (P). Of note, the healthy hemisphere will always be the right one since we  
191 induced hemorrhages only in the left hemisphere.

192 All the reported analyses were performed through in-house developed codes in MATLAB (MATLAB  
193 and Statistics Toolbox Release 2015b, The MathWorks, Inc., Natick, Massachusetts, USA).

194

## 195 **Histopathological examination**

196 Brains were cut with a small guillotine specifically prepared for the experiment (see Fig 2). Each  
197 brain has been positioned on a home-made wooden wedge to respect the same brain angle inclination  
198 measured from MRI images during the scan protocol; this aspect has been carefully considered to  
199 orient the cut parallel to the induced lesion (Fig 2).

200

### 201 **Fig 2. Operative procedure for brain cuts**

202 A) The inclination of the brain obtained from the T2w sagittal images.

203 B) The same inclination as in A) has been reproduced with wooden wedges to be used with a  
204 small guillotine specifically prepared for the experiment.

205

206 Transverse serial sections of all fixed brains were also obtained and photographed. Then, formalin-  
207 fixed paraffin-embedded brain sections (i.e, tissue blocks from all induced hematoma areas, as well  
208 as from ipsilateral and/or contralateral nervous tissues, particularly frontal Cerebral Cortex, Corpus  
209 Callosum, and Caudate Nucleus) were routinely processed for histology and stained with  
210 hematoxylin-eosin (H&E). The acquisition of the histological images and the evaluation of the  
211 margins of the lesions were carried out using the image analysis software LAS X Measurements  
212 (Leica microsystem).

213

## 214 **Validation of the proposed approach with histopathological analyses**

215 To validate the proposed approach, the classification results were compared to the histopathological  
216 findings as follows.

217 The classifier performance was assessed through a Receiver Operator Curve analyses where the  
218 ‘ground truth’ was represented by the histopathological results (S1D Fig) First, based on the  
219 histological analyses, the contours of the tissues involved with the hemorrhages were extracted. In  
220 what follows, we will denote this contour as the “true lesion contour”. Then, these images were  
221 manually co-registered to the anatomical MRI images by an expert radiologist. In this way, for every  
222 rabbit, we could directly compare the classification with the ground truth. This allowed to compute,  
223 for every lesion, the true positives (TP), as the number of voxels correctly classified as pathological  
224 (red voxels in the figures), i.e. voxels falling within the “true lesion contour”; the false negatives  
225 (FN), as the number of voxels classified as healthy falling inside the “true lesion contour”; the false  
226 positives (FP), as the number of voxels classified as pathological that fell outside the “true lesion  
227 contour” and the true negatives (TN) as the number of voxels classified as healthy (yellow in the  
228 figures) falling outside the “true lesion contour”. This allows computing the accuracy, true positive  
229 rate (TPR), and false-positive rate (FPR) according to the available literature [31]. Based on these

230 parameters, we computed the ROC and the corresponding area under the curve (AUC) that can be  
231 interpreted as follows:

232  $AUC = 0.5$  the test is not informative;

233  $0.5 < AUC \leq 0.7$  the test is not accurate;

234  $0.7 < AUC \leq 0.9$  the test is moderately accurate;

235  $0.9 < AUC < 1.0$  the test is highly accurate;

236  $AUC = 1$  perfect test [32].

237 ROC analyses were performed using an in-house developed code in MATLAB (MATLAB and  
238 Statistics Toolbox Release 2015b, The MathWorks, Inc., Natick, Massachusetts, USA).

239

240

## 241 **Results**

242

### 243 **Conventional MRI vs MR Relaxometry**

244 First, the conventional MR protocol was tested to identify the induced lesions. Based on T1w images,  
245 a board-certified radiologist judged the lesion as ‘not visible’ in 46% of the subjects and ‘barely  
246 visible’ in the remaining 54%. As an example, in Figs 3-5A the T1w images of three representative  
247 patients are shown. It can be noted that with that the typical settings of T1w sequences, the induced  
248 hemorrhages were not clearly identifiable in two of the reported cases (Figs 3 and 4A), while it was  
249 barely visible in the last one (Fig 5A). The visualization of the lesions improved when T2w images  
250 were considered (Fig 3-5B): the rate of lesions classified as ‘not visible’ dropped to 23% while the  
251 proportion of ‘clearly visible’ and ‘barely visible’ raised to 39% and 38%, respectively (see Figs 3-  
252 5B - white arrows). As it can be seen in the reported examples, lesions were characterized by ill-  
253 defined patterns whose extension varied throughout the sample. In 22% of the sample, the lesions

254 were localized in the left frontal lobe (Fig 4), and in the remaining 78%, the lesions were localized in  
255 the left thalamus (Figs 3 and 5).

256 Then, the T1 and T2 maps were estimated. In this case, a further improvement was obtained in terms  
257 of lesion identification: lesions were judged as ‘clearly visible’ in most of the sample, namely 85%  
258 for T1 maps (see Figs 3-5C) and 93% for T2 maps (see Figs 3-5D). In the remaining 5% and 7% for  
259 T1 and T2 maps respectively the lesion was not clearly detectable. In general, as it can be seen in  
260 Figs 3-5CD (white arrows), hyperintense lesions were observed with punctiform, linear, or irregular  
261 shape whose size varied across subjects.

262 Eventually, hierarchical clustering was performed to classify brain tissues. As described in Section  
263 2, a set of candidate voxels were selected based on T2 maps. As an example, we report in S1 Fig (see  
264 supplementary material) voxels selected (black dots) and their homologous ones (red dots) for the  
265 data of Fig 3. Based on their T1-relaxation signals (see S1B Fig), the hierarchical clustering was run.  
266 The final classification of healthy (H-yellow) and pathological (P-red) voxels is reported in Figs 3-  
267 5E overlaid on the T2 map (grayscale). Interestingly, in all reported cases, within the initially selected  
268 area, the hierarchical clustering identified a subset of ‘pathological’ voxels. Theoretically, since  
269 lesions were induced only in the left hemisphere, members of the P class were not expected in the  
270 right hemisphere. This applied to the reported cases of Figs 3-5.

271

272 **Fig 3. Standard vs MRR analyses and histopathological validation. Example 1.**

- 273 A) T1w transverse image of the brain; the lesion has been classified as ‘not visible’.
- 274 B) T2w transverse image of the brain; the lesion appears ill-defined, hyperintense, and linearly  
275 shaped in the left thalamus (white arrow).
- 276 C-D) T1 and T2 maps, respectively. A hyperintense linearly shaped area is visible in both maps  
277 (white arrow).
- 278 E) The output of the hierarchical cluster overlaid on the T2 map. Voxels classified as  
279 “pathological” and “healthy” parenchyma are reported in red and yellow, respectively.

280 F) The results of gross anatomy. From the photograph of the brain section, the contour of the  
281 hemorrhagic lesion characterized by a linear shape that mainly involves the left thalamus (white  
282 arrow) has been delineated (white dotted line).

283 G) Histopathology results. The overall brain section obtained from the microscope with the  
284 hemorrhagic lesion shown in greater detail superimposed on the overall section.

285 H) The MRR classification compared to both gross anatomy and histopathology: voxels  
286 classified as pathological (red) fall inside the estimated true lesion contour.

287

288 **Fig 4. Standard vs MRR analyses and histopathological validation. Example 2.**

289 A) T1w transverse image of the brain; the lesion has been judged ‘not visible’ by a board  
290 certified.

291 B) T2w transverse image of the brain. Also in this case the lesion appears ill-defined,  
292 hyperintense and linearly shaped in the left thalamus (white arrow)

293 C-D) T1 and T2 maps, respectively. A hyperintense linear-shaped area is visible in both maps  
294 (white arrow).

295 E) The output of the hierarchical cluster overlaid on the T2 map. Voxels classified as  
296 “pathological” and “healthy” parenchyma are reported in red and yellow, respectively.

297 F) The results of gross anatomy. From the photograph of the brain section, the contour of the  
298 hemorrhagic lesion characterized by a linear shape that involves the left frontal lobe (white  
299 arrow) has been delineated (white dotted line).

300 G) Histopathology results. The overall brain section obtained from the microscope with the  
301 hemorrhagic lesion shown in greater detail superimposed on the overall section is reported.

302 H) A good agreement can be noted between the MRR classification and the lesion contour  
303 estimated from both gross anatomy and histopathology.

304

305

306

307 **Fig 5. Standard vs MRR analyses and histopathological validation. Example 3.**

308 A) T1w transverse image of the brain; the lesion appears ill defined, hypointense, and irregular  
309 in the left thalamus (white arrow).

310 B) T2w transverse image of the brain. As in T1w, the lesion in the left thalamus appears ill-  
311 defined, irregular but hyperintense (white arrow).

312 C-D) T1 and T2 maps, respectively. A hyperintense and irregularly shaped area is visible in both  
313 maps (white arrow).

314 E) The output of the hierarchical cluster overlaid on the T2 map. Voxels classified as  
315 “pathological” and “healthy” parenchyma are reported in red and yellow, respectively.

316 F) The results of gross anatomy. From the photograph of the brain section, the contour of the  
317 hemorrhagic lesion that appears irregular in shape and involves the left thalamus (white arrow)  
318 has been delineated (white dotted line).

319 G) Histopathology results. The overall brain section obtained from the microscope with the  
320 hemorrhagic lesion shown in greater detail superimposed on the overall section.

321 H) The hemorrhagic lesion found by the MRR approach (red voxels) is in agreement with the  
322 gross anatomy: voxels classified as pathological fall inside the true lesion contour. It can be noted  
323 that in panel F) the hemorrhagic area appears more extended than the lesion histologically evident  
324 (G). However, this can be due to postmortem blood spread in the space between the left  
325 hemisphere and the ipsilateral thalamus. The contour of the hyperintense area in both T1 and T2  
326 maps is in very good agreement with the hemorrhagic area evident from the histopathological  
327 results where the blood spread disappeared after the formalin fixation.

328

329 However, there have been cases where classification partially failed and labeled as pathological also  
330 voxels in the healthy hemisphere, see for example Fig 6.

331

332

333 **Fig 6. Misclassification results**

334 A, D) The results of MRR classification do not show a clear distinction between the two groups of  
335 pathological vs healthy parenchyma, since pathological tissue was found in the healthy hemisphere.

336 B, E) The hemorrhagic lesion contour (white dashed line) estimated from the gross anatomy.

337 C-F) The comparison between the MRR classification and the true lesion contour shows that in these  
338 two cases the performance of the classifier is poor since both healthy (yellow) and pathological (red)  
339 voxels fall inside the lesion contour.

340

341

342

343 This aspect may be justified due to blood heparinization that may have led to a lack of a clear division  
344 between the hemorrhage and the brain parenchyma, see Discussion.

345 These findings show that it is fundamental to validate accurately the proposed approach. To this aim,  
346 we assessed the classification performance by comparing these results with the histopathological  
347 assessment.

348

349 **Histopathology assessment**

350 The induced hemorrhages varied in size and shape, and a superficial, subdural, or subarachnoid  
351 collection of blood was also usually observed. Most frequently affected areas were represented by  
352 the frontal cerebral cortex (gray and white matter), cingulate gyrus, and caudate nucleus.

353 Histologic evaluation was performed to identify the pattern of hemorrhage and perihemorrhagic  
354 tissue changes. Serial sections allowed to observe the extension of the hemorrhagic area caused by  
355 the needle-induced direct trauma and the aspect of perilesional tissues, not affected by the blood  
356 accumulation. In all the brains, a hemorrhagic lesion was detected with a pattern characterized by a  
357 moderate variation of intensity from case to case (Fig 7). The injected blood caused disruption of the

358 surrounding neural tissue, termed mass effect (Fig 7A, B) Fragmented nuclear debris was observed  
359 in damaged perihematomal tissue, in association with the presence of perihematomal edema,  
360 frequently characterized by gray matter vacuolization, neuronal perinuclear halos (Fig. 7C black  
361 arrow; 7D black arrow), and multifocal, mild dilation of perivascular (Virchow-Robin) spaces. Red  
362 blood cells within the wall of small vessels (intramural erythrocytes) and scattered swollen  
363 endothelial cells were also seen (Fig 7D white arrow). Also, multifocal cell shrinkage, with the  
364 presence of scattered hypoxic-ischemic neurons was detected in almost all cases (Fig 7D arrowhead;  
365 7E arrow). For comparison, neural tissues distant from the hematoma in the same section, as well as  
366 the corresponding contralateral areas in the unaffected cerebral hemisphere were examined, and no  
367 significant alterations were recorded, thus allowing to exclude the occurrence of histologic artifacts  
368 due to brain fixation or manipulation (Fig 7F).

369

#### 370 **Fig 7. Histopathological sections**

371 A-B) Low (A) and high (B) magnification of brain sections passing through the needle path, showing  
372 a linear hemorrhagic area.

373 C-D) Histological images of peri-hemorrhage neural tissue, showing variably intense, (C) gray  
374 (perinuclear halos; arrow) and (D) white matter edema (black arrow) and multifocal neuronal  
375 shrinkage (arrowhead). Red blood cells within the wall of a small vessel are also visible (white arrow).

376 E) Higher magnification of multifocal neuronal shrinkage (arrows) in peri-hemorrhagic tissue.

377 F) Histologically normal neurons in the contralateral area of the unaffected cerebral hemisphere.

378

379 The above aspects evidence the structural difference between the brain hemisphere with induced  
380 hemorrhage and the healthy one, thus confirming that the hyperintense areas on T1 and T2 maps were  
381 not artifactual in nature and correspond to real lesions.

382

383



384

385

## 386 **Validation of the proposed approach**

387 To validate the proposed approach, we compared, through a ROC analysis, the MRR results with the  
388 histopathological ones described above. For every patient, the lesion contours were manually  
389 delineated from both gross anatomy and histopathological images. In Figs 3-5F, we show the lesion  
390 contour (dashed line) extracted from a photograph of the section of the brain immediately after the  
391 extraction, typically within 10-15 minutes after the end of the MRI session. This section was selected  
392 as explained in Section 2, to match the MRI transverse plane where the relaxometry study was  
393 performed. Furthermore, the lesion contour was also obtained from the gross anatomy sections and  
394 microscopic analyses performed at 48 hours after the brain was kept in formalin. The macroscopic  
395 image of the brain section with an inset from the microscopic analyses of the hemorrhages is reported  
396 in Figs 3-5G. As it can be noted in Figs 3-5H, where the classification and anatomy results are  
397 superimposed, a good agreement between the gross anatomy (dashed) and MRR classified voxels  
398 (red) was obtained. However, as far as it regards the cases shown in Fig 6, the classification seems to  
399 match only the initial part of the lesion (see Fig 6C) or half of it (Fig 6F). Now, to quantitatively  
400 validate the MRR approach, (see Section 2) the TPR and FPR for each lesion were computed. The  
401 results reported in Table 2 seem promising since the mean TPR was 0.76, the mean FPR was 0.13  
402 leading to an overall accuracy of 0.83.

403

404

405

406

407

408

409

410

411

412 **Table 2. ROC analyses.**

| <b>RABBIT</b> | <b>TRUE<br/>POSITIVE<br/>RATE (TPR)</b> | <b>FALSE<br/>POSITIVE<br/>RATE (FPR)</b> | <b>ACCURACY</b> |
|---------------|-----------------------------------------|------------------------------------------|-----------------|
| 1             | 0.87                                    | 0.34                                     | 0.77            |
| 2             | 0.62                                    | 0.18                                     | 0.74            |
| 3             | 1                                       | 0                                        | 1               |
| 4             | 0.7                                     | 0.3                                      | 0.7             |
| 5             | 0.67                                    | 0.05                                     | 0.89            |
| 6             | 0.67                                    | 0.2                                      | 0.74            |
| 7             | 1                                       | 0.15                                     | 0.92            |
| 8             | 0.34                                    | 0                                        | 0.67            |
| 9             | 1                                       | 0                                        | 1               |
| 10            | 0.95                                    | 0.17                                     | 0.88            |
| 11            | 1                                       | 0                                        | 1               |
| 12            | 0.3                                     | 0                                        | 0.65            |
| 13            | 0.91                                    | 0                                        | 0.96            |
| <b>MEAN</b>   | <b>0.76</b>                             | <b>0.12</b>                              | <b>0.83</b>     |

413

414 TPR, FPR, and accuracy are reported for each rabbit.

415

416 In Fig 8 the ROC curve is reported (the point 1 and 0 are reported only for clarity purpose to show to  
417 reference bisecting line). As it can be noted, the classification performance is well beyond the chance

418 (0.5, dashed line) level, being the area under the curve  $AUC = 0.87$ . This value, compared to the  
419 thresholds reported in Section 2, places the performance of the classification close to the edge of  
420 “highly accurate” level ( $AUC = 0.9$ ).

421

422

### 423 **Fig 8. ROC analysis**

424 The ROC curve shows that the classifier performance (black line) is beyond the chance level (red  
425 line). The area under the curve ( $AUC=0.87$ ) compared to the thresholds reported in Section 2, places  
426 the performance of the classification close to the “highly accurate” level ( $AUC = 0.9$ ).

427

428

## 429 **Discussion**

430

431 In this study, we proposed a multivariate MRR approach to identify subtle brain hemorrhages on a  
432 rabbit model. The developed technique, which supports a diagnosis at the subject level, has been  
433 compared to conventional MRI and validated through histopathological examinations. The proposed  
434 approach, being optimized for a low field scanner, routinely available in the veterinary facilities, has  
435 the advantage of a potential direct translation into the clinical practice.

436 In general, the MRI sensitivity for detecting subtle lesions such as edema or hemorrhages increases  
437 with the magnetic field. Thus, with low field scanners typically used in veterinary practice, these  
438 hemorrhagic diseases are likely to be underdiagnosed [25]. For this reason, we tested our approach  
439 on induced hemorrhagic lesions obtained by injecting a minimal amount of blood to create a  
440 reproducible and lateralized lesion. This allowed to compare the injured and healthy parenchyma  
441 within a single MR scan. This approach is in line with previous works in the literature, for example  
442 in [33] the authors injected autologous blood in the right hemisphere of rat brains to evaluate the

443 effects of experimental intracerebral hemorrhage on brain tissue injury and recovery. They reported  
444 that MR relaxometry can be promising to observe the lesion progression. Our choice to focus on T1  
445 and T2 Relaxometry, instead of T2\*, shown also reliable in visualizing hemorrhage [34], is also in  
446 line with previous MRR studies on this kind of lesions [22,26,33]. In fact, to setup T2\* relaxometry  
447 protocols can be very challenging with a low field clinical scanner, and thus T1/T2 MRR has the  
448 advantage of being more easily implemented in the future by veterinary practitioners on a large scale.  
449 The proposed approach is multivariate, i.e. it combined both T1 and T2 information: the highest  
450 contrast in the T2 map was exploited to select the initial ROIs, while the hierarchical clustering was  
451 driven by the T1-based signal recovery. In fact, in terms of qualitative evaluation, in our data, the  
452 lesions resulted always more evident in T2 maps than in T1 ones. Moreover, the adoption of the T1  
453 signal to drive the classification is in line with the literature where T1 relaxometry has been proved  
454 to be useful to assess brain parenchyma even with low field scanners [22,35]. Nevertheless, this  
455 choice leads to a higher acquisition time, which is one of the main drawbacks of the proposed  
456 approach. Previous works showed that at higher magnetic fields (>0.25 T) T2\* MRR can alleviate  
457 this aspect and reliably identify brain hemorrhages, see for example [34].  
458 The adoption of hierarchical clustering in this study, is supported by the fact that this approach has  
459 been previously applied in the histopathological field to distinguish different tissue features, see for  
460 example [36–38] and lesions characterized by different patterns [39–41]. In the case of subtle lesions,  
461 such identification with standard MRI techniques can be very and any advanced analysis tool must  
462 be validated. To this aim, here, the classification performance was directly addressed through the  
463 comparison with histopathological analyses.  
464 As far as it strictly concerns the histopathology findings, in acute human spontaneous intracerebral  
465 hemorrhages, as well as in those induced by injecting blood in different animal models (42), primary  
466 tissue damage is followed by secondary pathological lesions, in which cellular and  
467 neuroinflammatory changes are poorly defined. Most of the studies published on this topic refer to  
468 24/48 hours postmortem histological changes [43,44], especially focusing on the time and mass effect

469 of the lesion, cerebral edema, and ischemic cell changes affecting the adjacent neural tissue.  
470 Consistently, in all our cases the histopathological examination on fixed tissue, one hour after  
471 suppression, showed initial alterations such as peri-hemorrhage edema as well as mild vascular and  
472 neuronal degeneration. The findings were crucial to confirm our MR tissue classification. In fact, the  
473 lesion contours extracted using the gross anatomy and histopathological images showed a good  
474 performance of the MRR classification.

475 However, in some cases, the adopted approach partially failed to identify the lesion. This could be to  
476 a small amount of blood that, because of heparinization, slightly infiltrated the neural tissues around  
477 the line of needle insertion during the injection. Such a small blood infiltration in the surrounding  
478 healthy parenchyma could make the MRR clustering unable to distinguish the boundary real  
479 hemorrhage-healthy tissues that instead appears evident from the histopathology after the brain  
480 fixation. This hypothesis related to heparinization is supported by the work of Dai et al. (2018), where  
481 authors, contrary to what has been herein described, used autologous nonheparinized blood into  
482 cerebral parenchyma for their experiment and observed in their results a clear distinction between  
483 hemorrhagic tissue and parenchyma [42].

484 In general, caution must be taken in comparing the histopathological and MRI analyses, for several  
485 reasons, e.g different slice thickness on MRI images and gross anatomy, potential misalignment, the  
486 effect of formalin fixation. Specifically, it has been reported that there is a reduction in tissue volume  
487 of approximately 33% after formalin fixation and paraffin embedding [45]. This may have influenced  
488 the data comparison, since after tissue fixation the size of the original lesion investigated with  
489 relaxometry may have changed, thus relying on a possible bias during results data co-registration and  
490 agreement quantification. Nevertheless, the obtained sensitivity and specificity place the classifier at  
491 the edge between moderate and highly accurate.

492 The current results pave the way for future Artificial Intelligence (AI) based techniques which are  
493 being developed to assist physicians in improving their diagnosis [46]. In this scenario, after being  
494 trained, a classification algorithm automatically maps the observations to a set of classes. Our work

495 can be considered seminal for future AI applications validating a combined T1/T2 MRR hierarchical  
496 clustering for the classification step [47,48]. At the current stage, in our approach, the training is  
497 missing, and the proposed procedure is semi-automatic relying on a manual selection of candidate  
498 ROIs. However, the algorithm training requires datasets whose size is larger than our current sample.  
499 Therefore, it represents a future development of this technique where part of the data will train the  
500 classifier, and the remaining will be automatically classified [49,50].  
501 To conclude, to the best of our knowledge, this is the first report on an advanced MRR classification  
502 tested on a routinely low field scanner showing that MRI diagnostic potential could be improved  
503 especially in animal brain disorders causing subtle lesions (such as e.g distemper encephalitis or  
504 hepatic encephalopathy).

505

506

507

## 508 **Acknowledgments**

509 The authors would like to acknowledge the contributions of Giovanni Angelozzi (for having built  
510 the guillotine), and Marina Baffoni (for technical assistance).

511

512

513

514

515

516

517

518

519

520

## 521 **References**

522

523 1. Robertson I. Optimal Magnetic Resonance Imaging of the Brain. *Vet Radiol Ultrasound*.  
524 2011;52(s1):S15–22.

525 2. Thrall DE. Magnetic Resonance Imaging Features of Disease. In: *Small Animals in*  
526 *Textbook of Veterinary Diagnostic Radiology*. 7<sup>th</sup> Ed. Elsevier; 2018. p. 204.

527 3. Cheng H-LM, Stikov N, Ghugre NR, Wright GA. Practical medical applications of  
528 quantitative MR relaxometry. *J Magn Reson Imaging*. 2012;36(4):805–24.

529 4. Deoni SCL. Quantitative Relaxometry of the Brain. *Top Magn Reson Imaging*.  
530 2010;21(2):101–13.

531 5. de Blank P, Badve C, Gold DR, Stearns D, Sunshine J, Dastmalchian S, et al. Magnetic  
532 Resonance Fingerprinting to Characterize Childhood and Young Adult Brain Tumors. *Pediatr*  
533 *Neurosurg*. 2019;54(5):310–8.

534 6. Fathi Kazerooni A, Nabil M, Zeinali Zadeh M, Firouznia K, Azmoudeh-Ardalan F, Frangi  
535 AF, et al. Characterization of active and infiltrative tumorous subregions from normal tissue in  
536 brain gliomas using multiparametric MRI. *J Magn Reson Imaging*. 2018;48(4):938–50.

537 7. Ellingson BM, Cloughesy TF, Lai A, Nghiemphu PL, Lalezari S, Zaw T, et al.  
538 Quantification of edema reduction using differential quantitative T2 (DQT2) relaxometry mapping  
539 in recurrent glioblastoma treated with bevacizumab. *J Neurooncol*. 2012;106(1):111–9.

540 8. Hattingen E, Jurcoane A, Daneshvar K, Pilatus U, Mittelbronn M, Steinbach JP, et al.  
541 Quantitative T2 mapping of recurrent glioblastoma under bevacizumab improves monitoring for  
542 non-enhancing tumor progression and predicts overall survival. *Neuro-Oncol*. 2013;15(10):1395–  
543 404.

544 9. Lescher S, Jurcoane A, Veit A, Bähr O, Deichmann R, Hattingen E. Quantitative T1 and T2  
545 mapping in recurrent glioblastomas under bevacizumab: earlier detection of tumor progression

- 546 compared to conventional MRI. *Neuroradiology*. 2015;57(1):11–20.
- 547 10. Chen H, Yu G, Wang J, Li F, Li G. Application of T2 relaxometry in lateralization and  
548 localization of mesial temporal lobe epilepsy and corresponding comparison with MR volumetry.  
549 *Acta Radiol Stockh Swed* 1987. 2016;57(9):1107–13.
- 550 11. Goubran M, Hammond RR, de Ribaupierre S, Burneo JG, Mirsattari S, Steven DA, et al.  
551 Magnetic resonance imaging and histology correlation in the neocortex in temporal lobe epilepsy.  
552 *Ann Neurol*. 2015;77(2):237–50.
- 553 12. Khan AR, Goubran M, de Ribaupierre S, Hammond RR, Burneo JG, Parrent AG, et al.  
554 Quantitative relaxometry and diffusion MRI for lateralization in MTS and non-MTS temporal lobe  
555 epilepsy. *Epilepsy Res*. 2014;108(3):506–16.
- 556 13. Coan AC, Bonilha L, Morgan PS, Cendes F, Li LM. T2-weighted and T2 relaxometry  
557 images in patients with medial temporal lobe epilepsy. *J Neuroimaging*. 2006;16(3):260–5.
- 558 14. Vos SB, Winston GP, Goodkin O, Pemberton HG, Barkhof F, Prados F, et al. Hippocampal  
559 profiling: Localized magnetic resonance imaging volumetry and T2 relaxometry for hippocampal  
560 sclerosis. *Epilepsia*. 2020;61(2):297–309.
- 561 15. Winston GP, Vos SB, Burdett JL, Cardoso MJ, Ourselin S, Duncan JS. Automated T2  
562 relaxometry of the hippocampus for temporal lobe epilepsy. *Epilepsia*. 2017;58(9):1645–52.
- 563 16. Gracien R-M, Reitz SC, Hof S-M, Fleischer V, Zimmermann H, Droby A, et al. Assessment  
564 of cortical damage in early multiple sclerosis with quantitative T2 relaxometry. *NMR Biomed*.  
565 2016;29(4):444–50.
- 566 17. Lönnfors-Weitzel T, Weitzel T, Slotboom J, Kiefer C, Pollo C, Schüpbach M, et al. T2-  
567 relaxometry predicts outcome of DBS in idiopathic Parkinson’s disease. *NeuroImage Clin*. 1  
568 2016;12:832–7.
- 569 18. Knight MJ, Wearn A, Coulthard E, Kauppinen RA. T2 Relaxometry and Diffusion Tensor  
570 Indices of the Hippocampus and Entorhinal Cortex Improve Sensitivity and Specificity of MRI to  
571 Detect Amnestic Mild Cognitive Impairment and Alzheimer’s Disease Dementia. *J Magn Reson*



- 572 Imaging. 2019;49(2):445–55.
- 573 19. Deruelle T, Kober F, Perles-Barbacaru A, Delzescaux T, Noblet V, Barbier EL, et al. A  
574 Multicenter Preclinical MRI Study: Definition of Rat Brain Relaxometry Reference Maps. *Front*  
575 *Neuroinformatics* 2020; 14: 22.
- 576 20. Sénégas J, Liu W, Dahnke H, Song H, Jordan EK, Frank JA. Fast T2 relaxometry with an  
577 accelerated multi-echo spin-echo sequence. *NMR Biomed*. 2010;23(8):958–67.
- 578 21. Lorincz BA, Anson A, Csébi P, Bajzik G, Biró G, Tichy A, et al. Novel approach to  
579 magnetic resonance imaging of epileptic dogs - T2 relaxometry of the brain with emphasised  
580 hippocampus. *Acta Vet Hung*. 2017;65(2):185–97.
- 581 22. Del Signore F, Vignoli M, Marruchella G, Simeoni F, Tamburro R, Aste G, et al. The  
582 potential role of magnetic resonance brain relaxometry in veterinary medicine: a preliminary study.  
583 *J Biol Regul Homeost Agents*. 2019;33(6):1725–36.
- 584 23. Konar M, Lang J. Pros and cons of low-field magnetic resonance imaging in veterinary  
585 practice. *Vet Radiol Ultrasound*. 2011;52(1 Suppl 1):S5–14.
- 586 24. Rusbridge C, Long S, Jovanovik J, Milne M, Berendt M, Bhatti SFM, et al. International  
587 Veterinary Epilepsy Task Force recommendations for a veterinary epilepsy-specific MRI protocol.  
588 *BMC Vet Res*. 2015;11:194.
- 589 25. Mai W. Brain Hemorrhage. In: *Diagnostic MRI in Dogs and Cats*. 1<sup>st</sup> Ed. CRC Press; 2018.  
590 p. 284
- 591 26. Pan W, Yan Q, Qin M, Jin G, Sun J, Ning X, et al. Detection of Cerebral Hemorrhage in  
592 Rabbits by Time-Difference Magnetic Inductive Phase Shift Spectroscopy. *PLoS ONE*. 2015  
593 .22;10(5):e0128127.
- 594 27. Huhdanpaa H, Hwang DH, Gasparian GG, Booker MT, Cen Y, Lerner A, et al. Image  
595 coregistration: quantitative processing framework for the assessment of brain lesions. *J Digit*  
596 *Imaging*. 2014;27(3):369–79.
- 597 28. Lagarias JC, Reeds JA, Wright MH, Wright PE. Convergence Properties of the Nelder-

- 598 Mead Simplex Method in Low Dimensions. *SIAM J Optim.* 1998;9:112–47.
- 599 29. Carneiro A a. O, Vilela GR, Araujo DB de, Baffa O. MRI relaxometry: methods and  
600 applications. *Braz J Phys.* 2006;36(1A):9–15.
- 601 30. Rousseeuw PJ. Silhouettes: A graphical aid to the interpretation and validation of cluster  
602 analysis. *J Comput Appl Math.* 1987;20:53–65.
- 603 31. Altman DG, Bland JM. Diagnostic tests. 1: Sensitivity and specificity. *BMJ.*  
604 1994;308(6943):1552.
- 605 32. D’Arrigo G, Provenzano F, Torino C, Zoccali C, Tripepi G. [Diagnostic tests and ROC  
606 curves analysis]. *G Ital Nefrol.* 2011;28:642–7.
- 607 33. Knight Robert A., Han Yuxia, Nagaraja Tavarekere N., Whitton Polly, Ding Jennifer,  
608 Chopp Michael, et al. Temporal MRI Assessment of Intracerebral Hemorrhage in Rats. *Stroke.*  
609 2008;39(9):2596–602.
- 610 34. Küker W, Thiex R, Rohde I, Rohde V, Thron A. Experimental acute intracerebral  
611 hemorrhage. Value of MR sequences for a safe diagnosis at 1.5 and 0.5 T. *Acta Radiol Stockh*  
612 *Swed* 1987. 2000;41(6):544–52.
- 613 35. Zotev VS, Matlashov AN, Savukov IM, Owens T, Volegov PL, Gomez JJ, et al. SQUID-  
614 Based Microtesla MRI for In Vivo Relaxometry of the Human Brain. *IEEE Trans Appl Supercond.*  
615 2009;19(3):823–6.
- 616 36. Au NHC, Cheang M, Huntsman DG, Yorida E, Coldman A, Elliott WM, et al. Evaluation of  
617 immunohistochemical markers in non-small cell lung cancer by unsupervised hierarchical  
618 clustering analysis: a tissue microarray study of 284 cases and 18 markers. *J Pathol.* settembre  
619 2004;204(1):101–9.
- 620 37. Bunyak F, Hafiane A, Palaniappan K. Histopathology tissue segmentation by combining  
621 fuzzy clustering with multiphase vector level sets. *Adv Exp Med Biol.* 2011;696:413–24.
- 622 38. Fouad S, Randell D, Galton A, Mehanna H, Landini G. Unsupervised morphological  
623 segmentation of tissue compartments in histopathological images. *PLoS One.*

- 624 2017;12(11):e0188717.
- 625 39. Wang Y, Li T-Q. Analysis of whole-brain resting-state fMRI data using hierarchical  
626 clustering approach. *PloS One*. 2013;8(10):e76315.
- 627 40. Cordes D, Haughton V, Carew JD, Arfanakis K, Maravilla K. Hierarchical clustering to  
628 measure connectivity in fMRI resting-state data. *Magn Reson Imaging*. 2002;20(4):305–17.
- 629 41. Gors D, Suetens P, Vandenberghe R, Claes P. Hierarchical spectral clustering of MRI for  
630 global-to-local shape analysis: Applied to brain variations in Alzheimer’s disease. In: 2017 IEEE  
631 14th International Symposium on Biomedical Imaging (ISBI 2017). 2017. pag. 787–91.
- 632 42. Dai M, Liu X-C, Li H-T, Xu C-H, Yang B, Wang H, et al. EIT Imaging of Intracranial  
633 Hemorrhage in Rabbit Models Is Influenced by the Intactness of Cranium. *BioMed Res Int*.  
634 2018;2018:1–10.
- 635 43. Koeppen AH, Dickson AC, McEvoy JA. The cellular reactions to experimental intracerebral  
636 hemorrhage. *J Neurol Sci*. 1995;134:102–12.
- 637 44. Shtaya A, Bridges LR, Esiri MM, Lam-Wong J, Nicoll JAR, Boche D, et al. Rapid  
638 neuroinflammatory changes in human acute intracerebral hemorrhage. *Ann Clin Transl Neurol*.  
639 2019;6(8):1465–79.
- 640 45. Bancroft J. *Theory and practice of histological techniques*. 5<sup>th</sup> Ed. Elsevier; p. 71–72.
- 641 46. Topol E. High-performance medicine: the convergence of human and artificial intelligence.  
642 *Nat Med*. 2019;25.
- 643 47. Sulaiman SN, Non NA, Isa IS, Hamzah N. Segmentation of brain MRI image based on  
644 clustering algorithm. In: 2014 IEEE Symposium on Industrial Electronics Applications (ISIEA).  
645 2014. pag. 60–5.
- 646 48. Saha S, Bandyopadhyay S. MR Brain Image Segmentation Using A Multi-seed Based  
647 Automatic Clustering Technique. *Fundam Informaticae*. 2009;97(1–2):199–214.
- 648 49. Arbabshirani MR, Plis S, Sui J, Calhoun VD. Single subject prediction of brain disorders in  
649 neuroimaging: Promises and pitfalls. *NeuroImage*. 2017;145(Part B):137–65.

650 50. Vabalas A, Gowen E, Poliakoff E, Casson AJ. Machine learning algorithm validation with a  
651 limited sample size. PLoS ONE. 2019. 7;14(11):e0224365

652

## 653 **Supporting Information**

### 654 **S1 Fig Analysis pipeline**

655 A) The voxels manually selected on the suspected lesion (black dots) are automatically extracted  
656 on the contralateral hemisphere (red dots) based on the brain midline. This step is based on  
657 the T2 map.

658 B) T1 based signals are extracted from the selected set of voxels. These patterns will be input to  
659 the hierarchical classification.

660 C) The final dendrogram for the data is pointed, and it can be seen that the cluster silhouette  
661 suggested that optimal separation corresponded to two clusters respectively healthy and  
662 hemorrhagic tissue.

663 D) The classifier is validated through the histopathological results. The validation is based on  
664 the true lesion contour and quantified employing ROC parameters such as TPR, FPR, and  
665 accuracy.

666



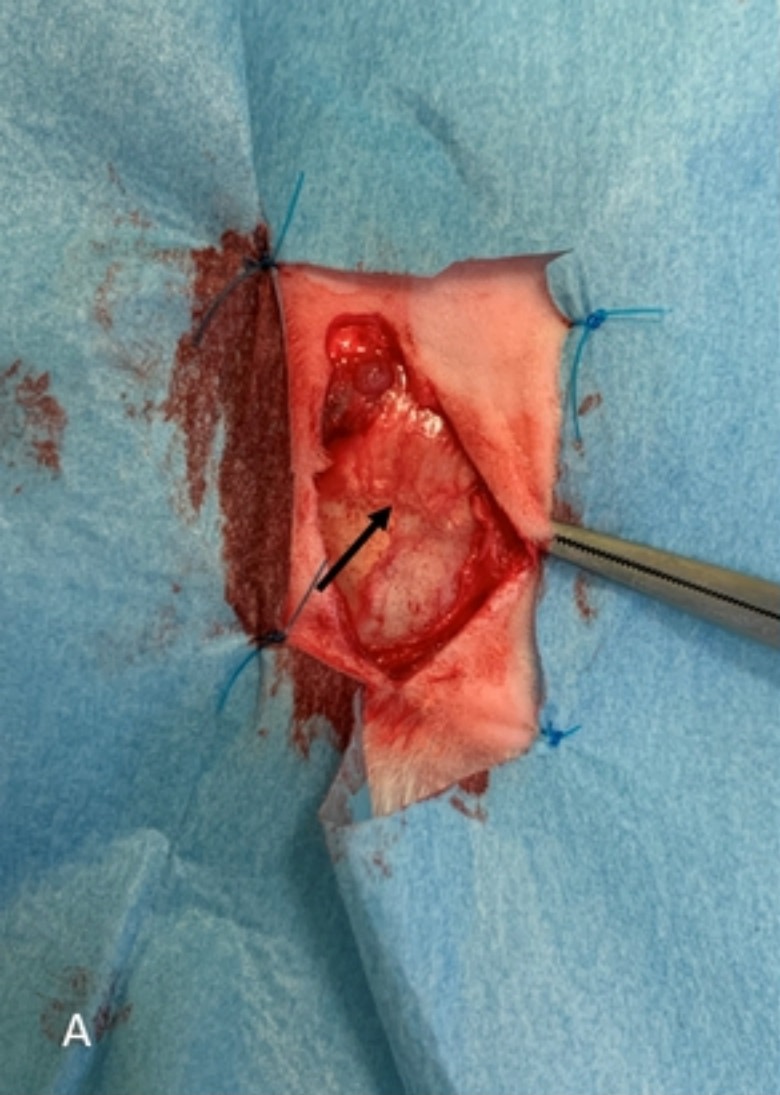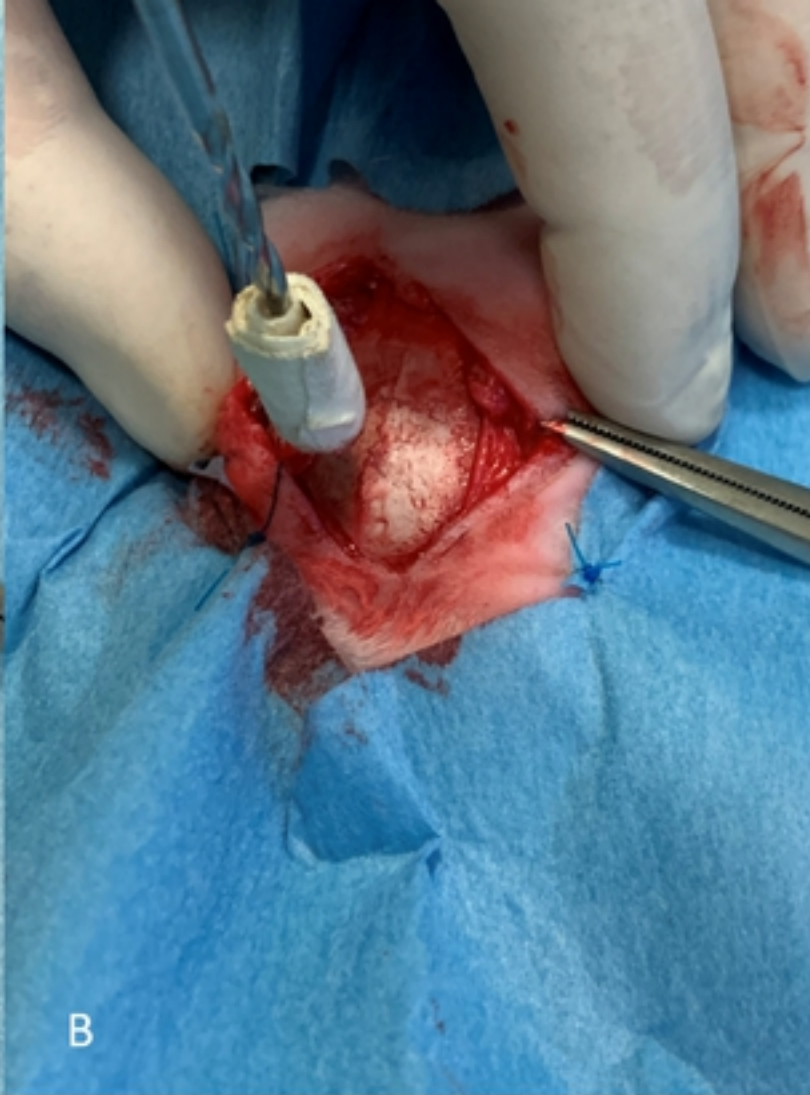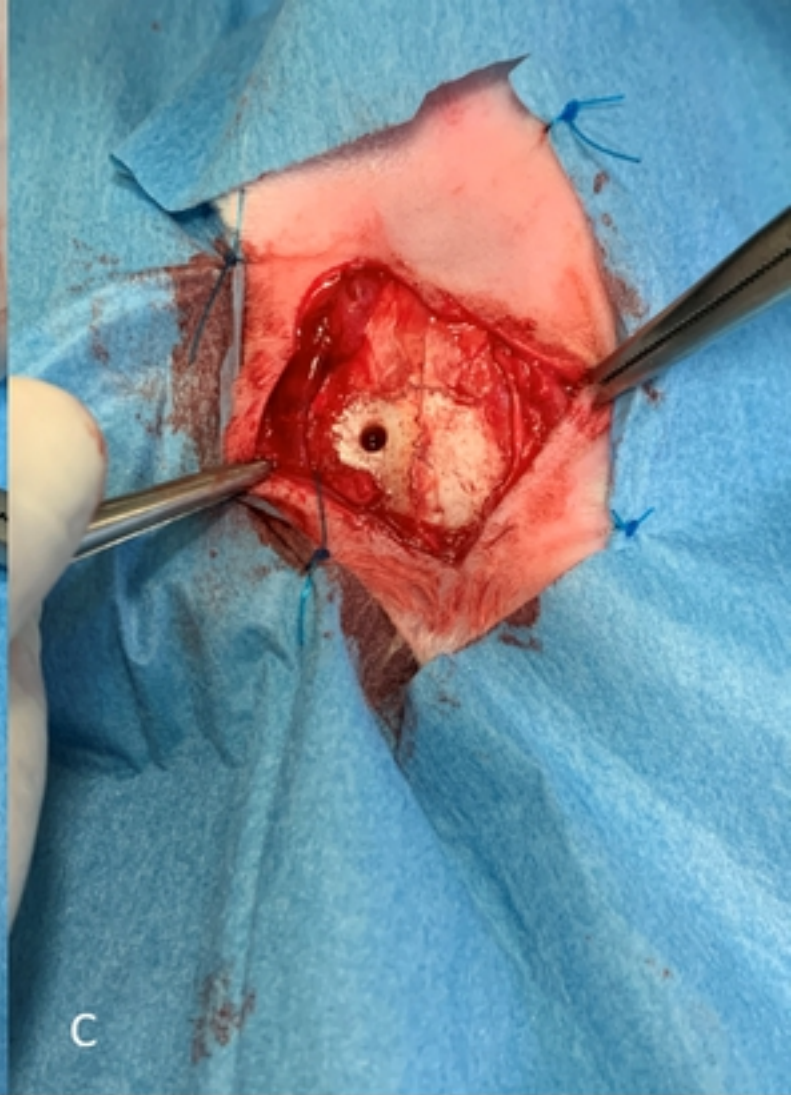

Figure 1

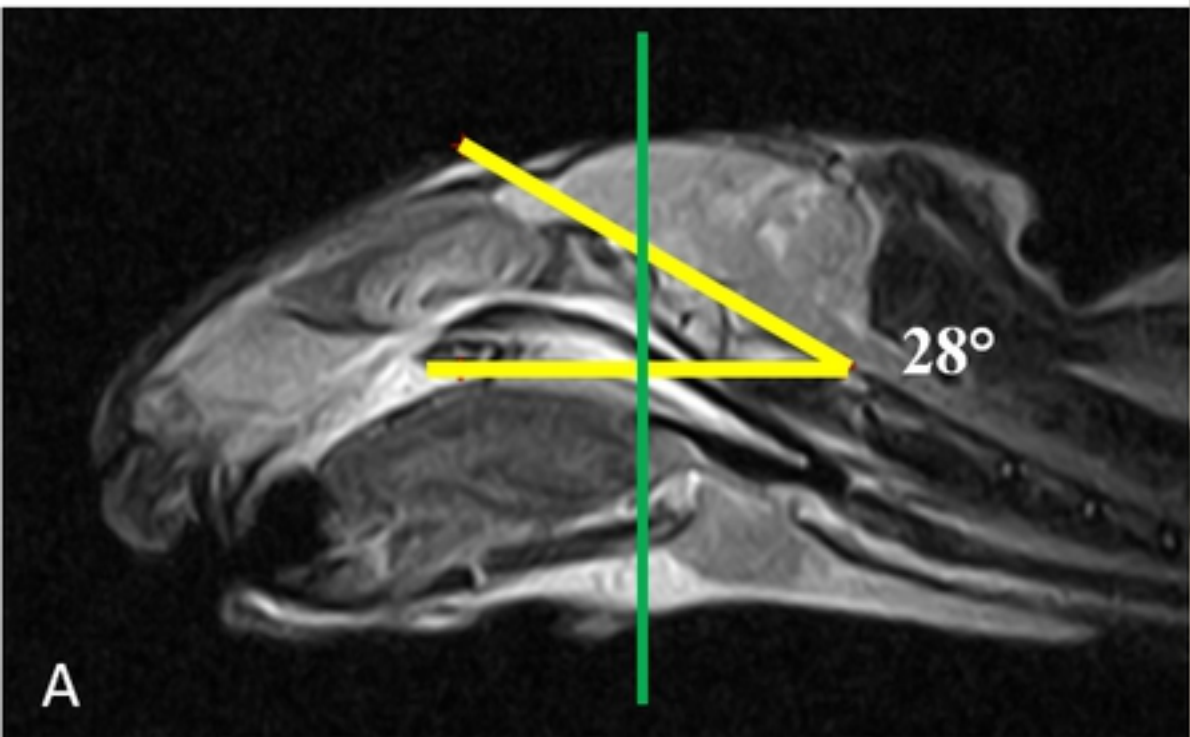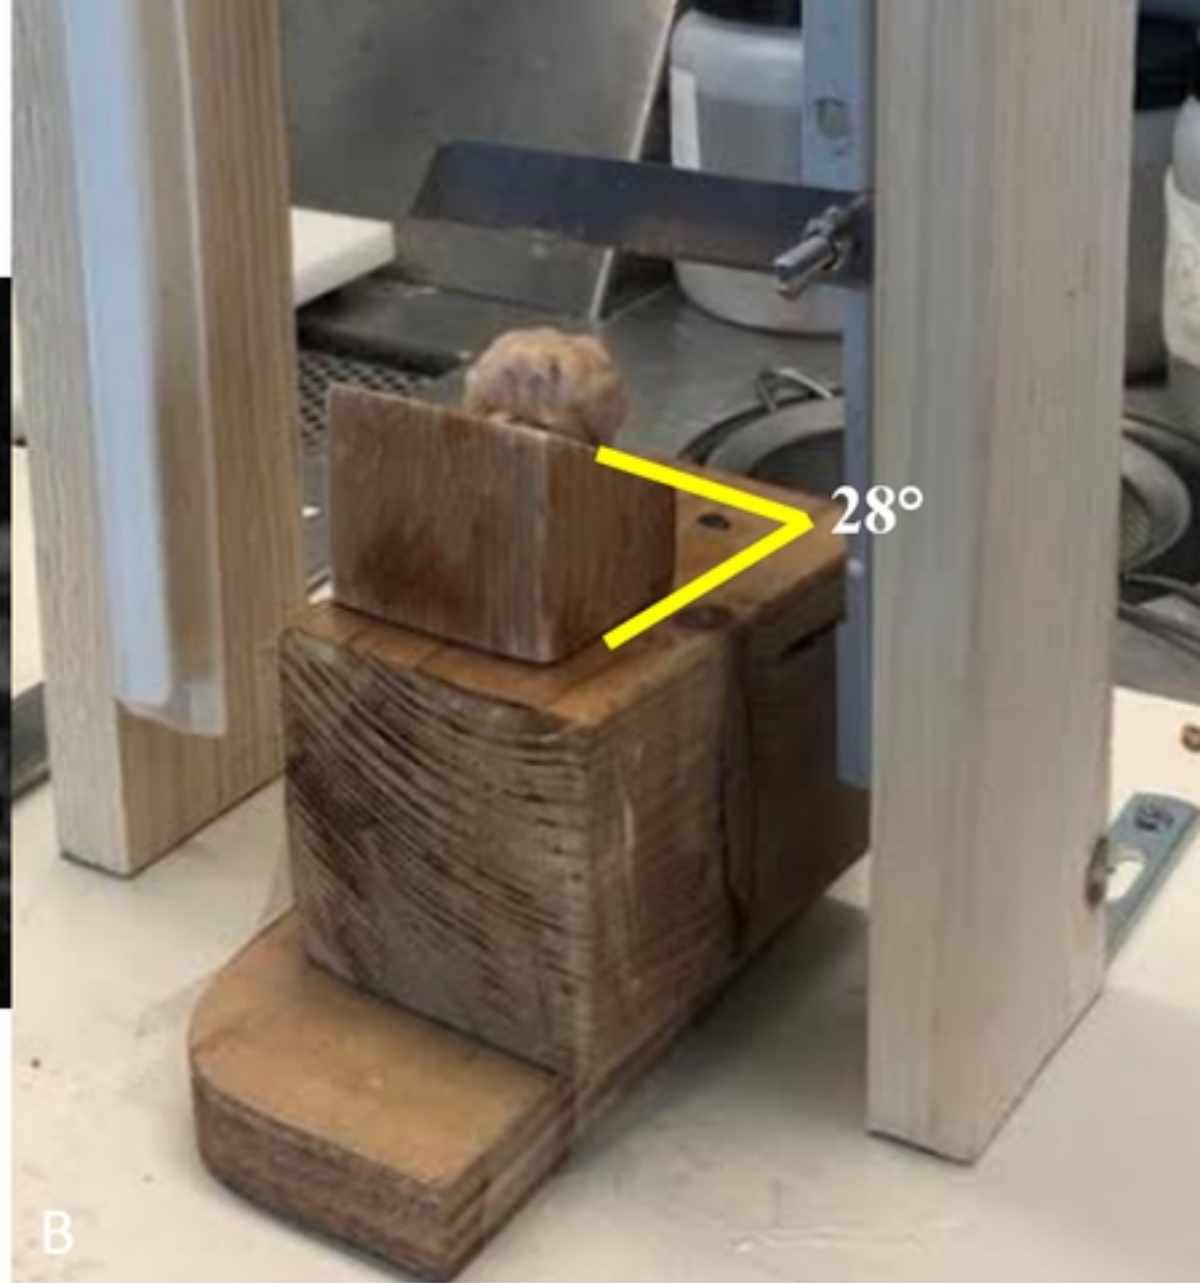

Figure 2



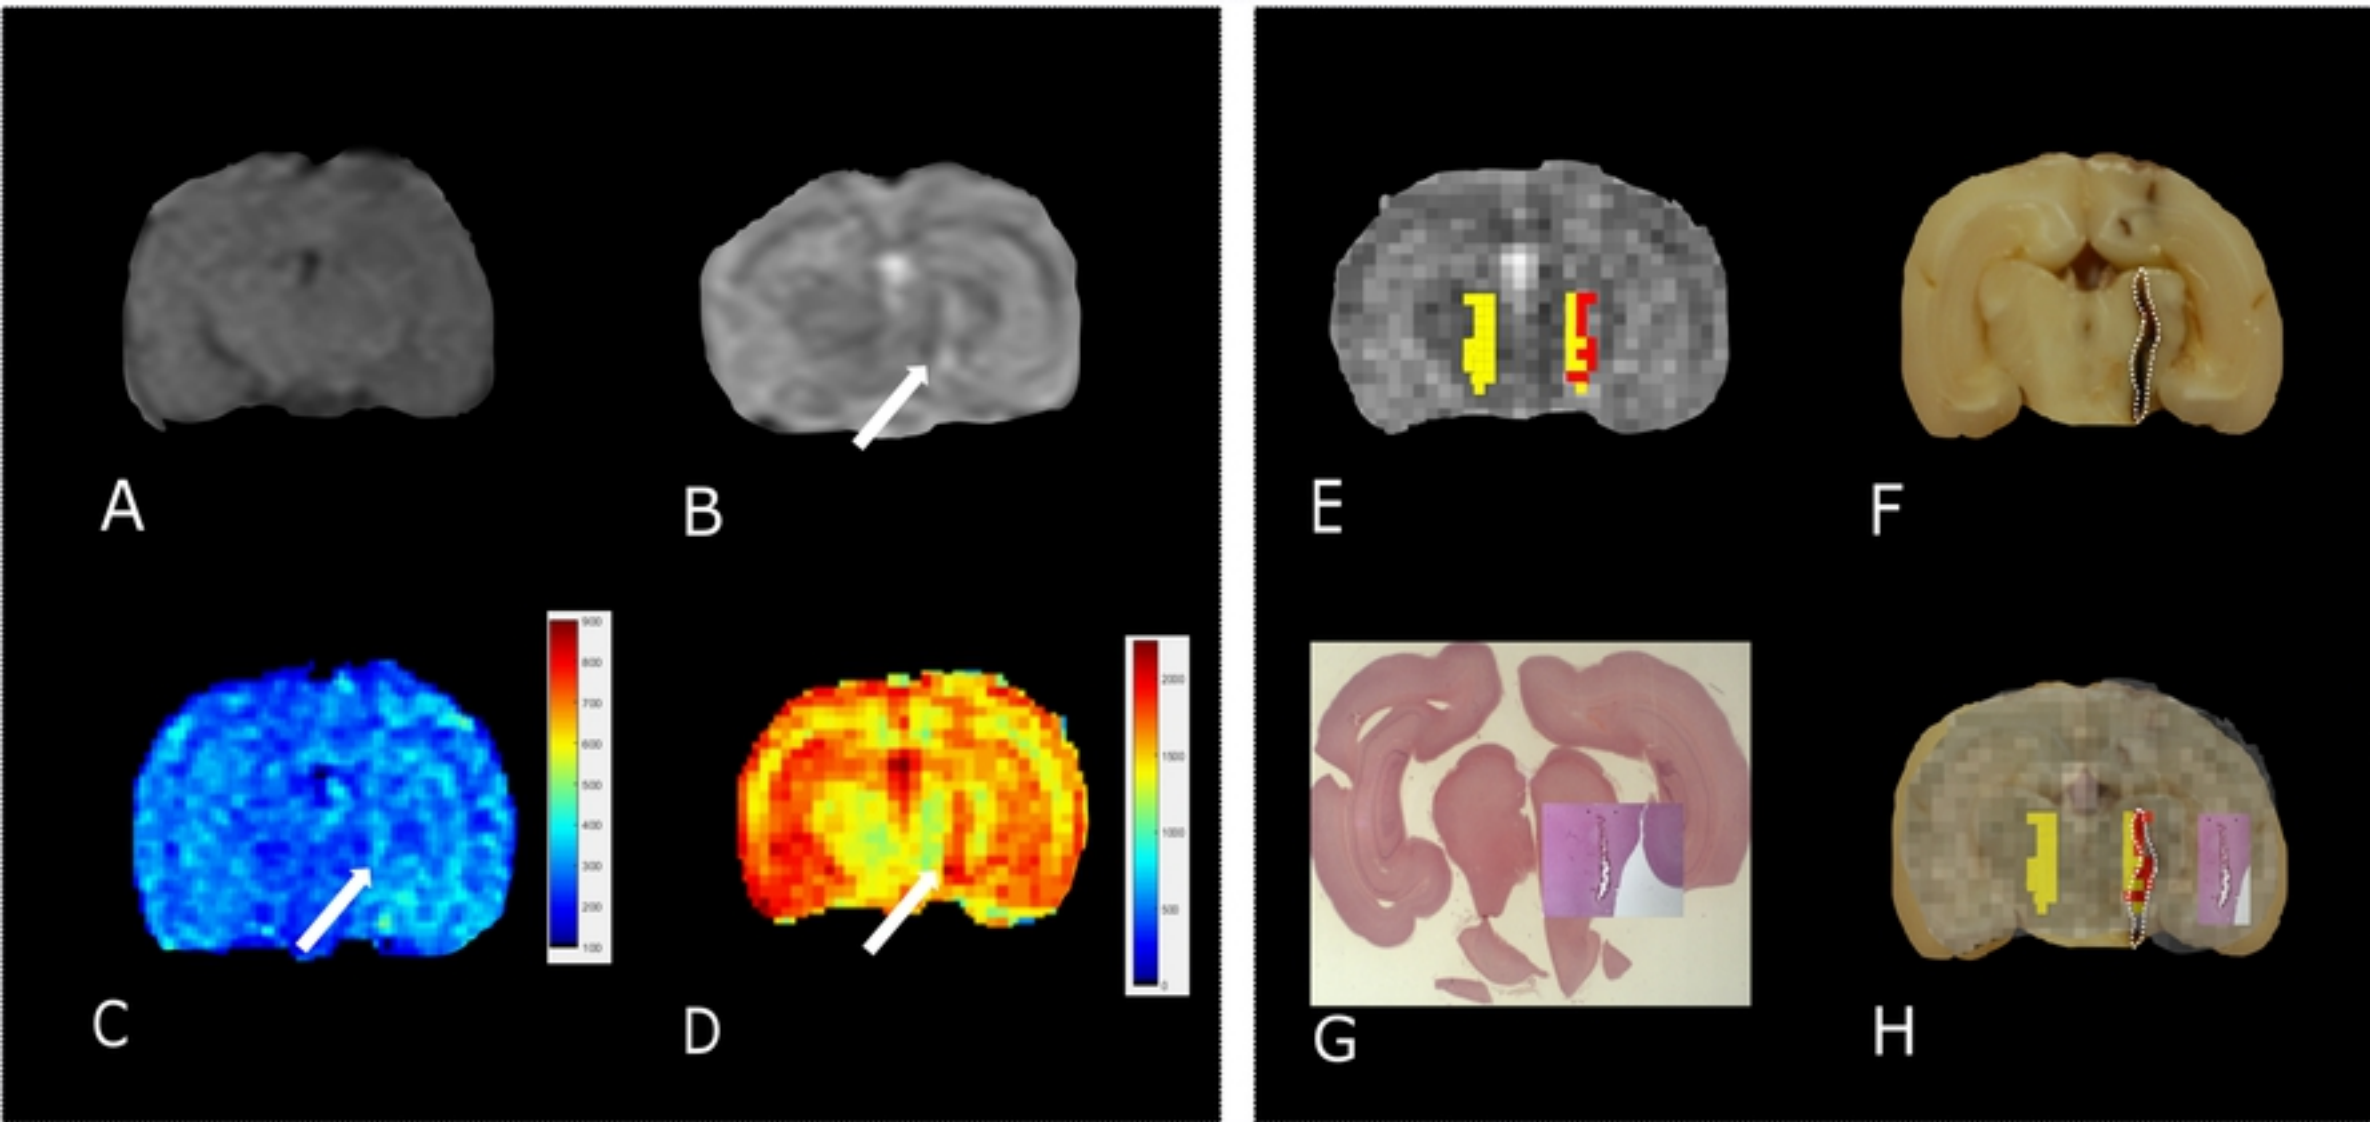

Figure 3

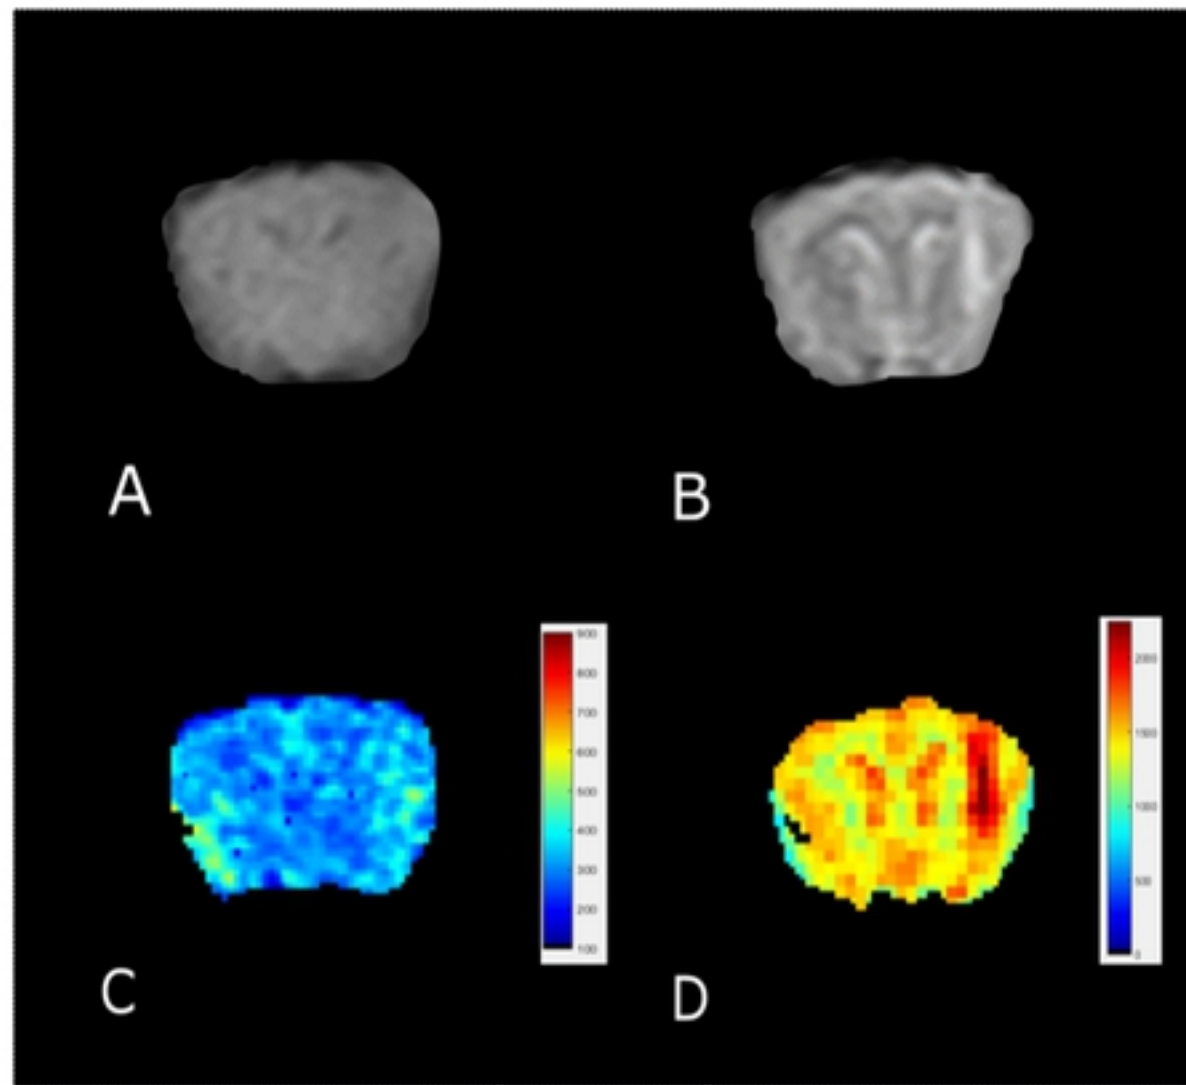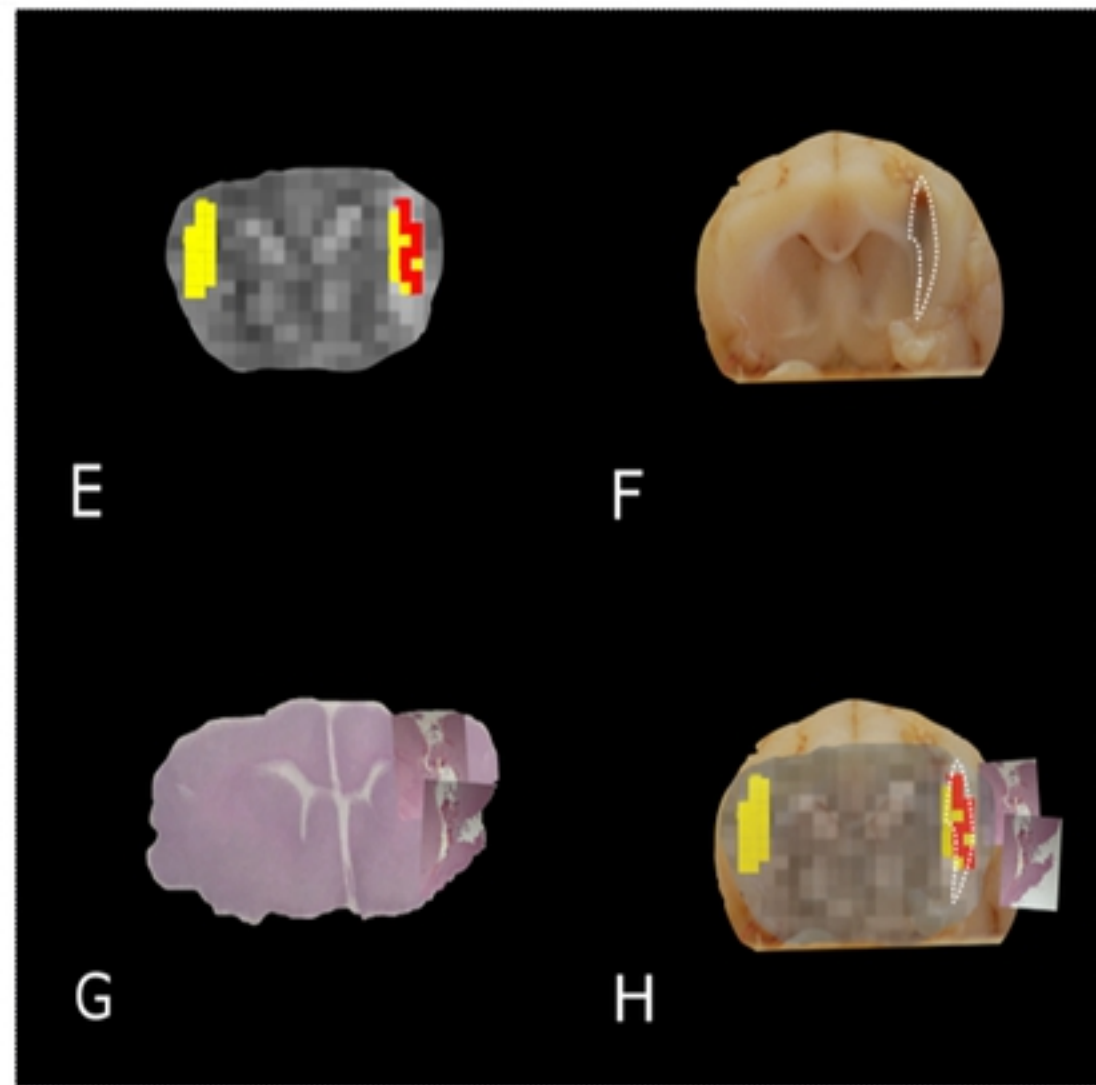

Figure 4



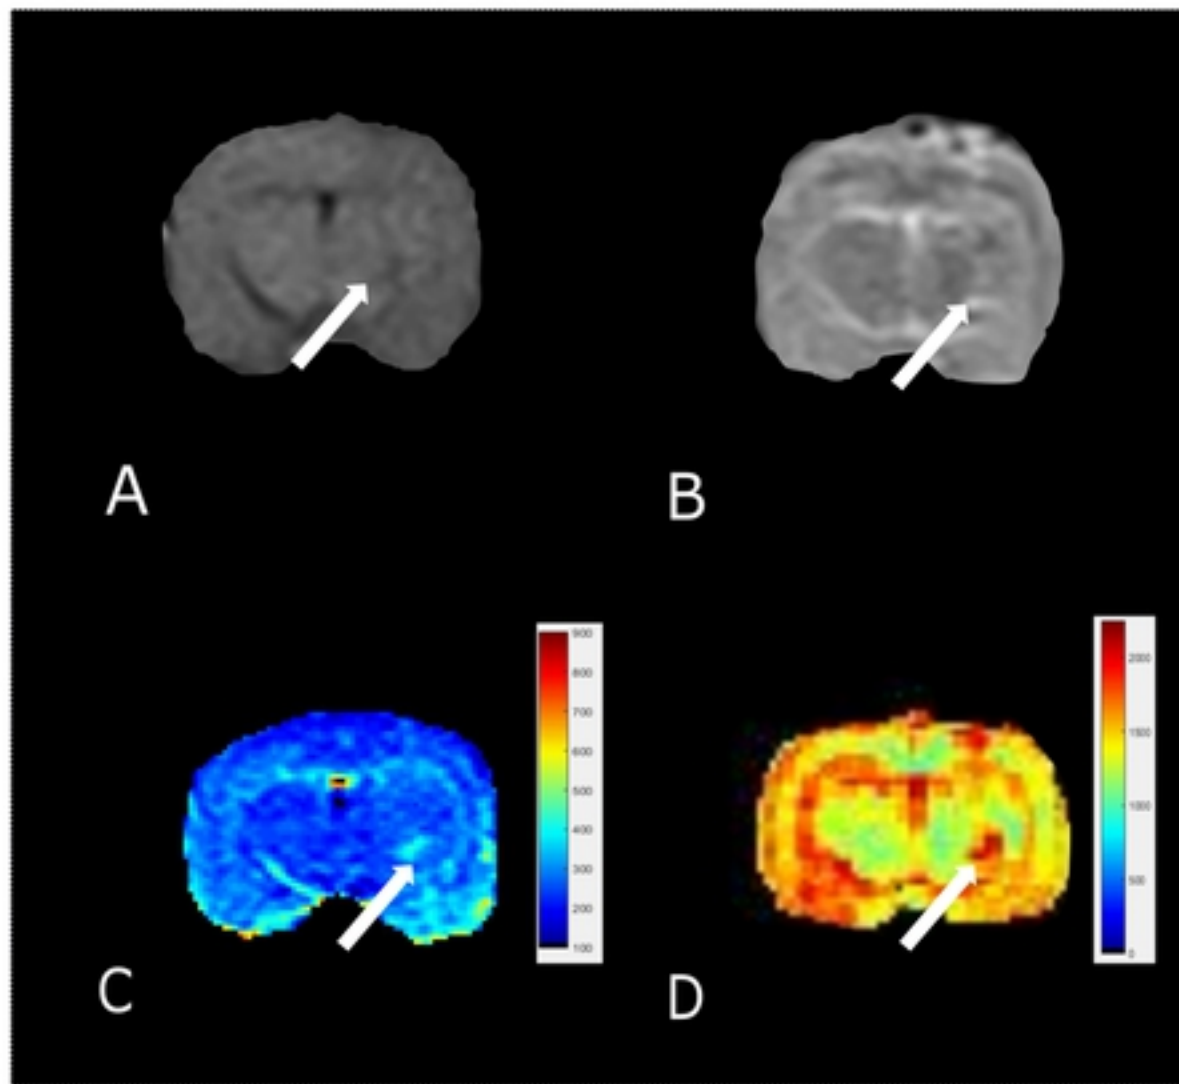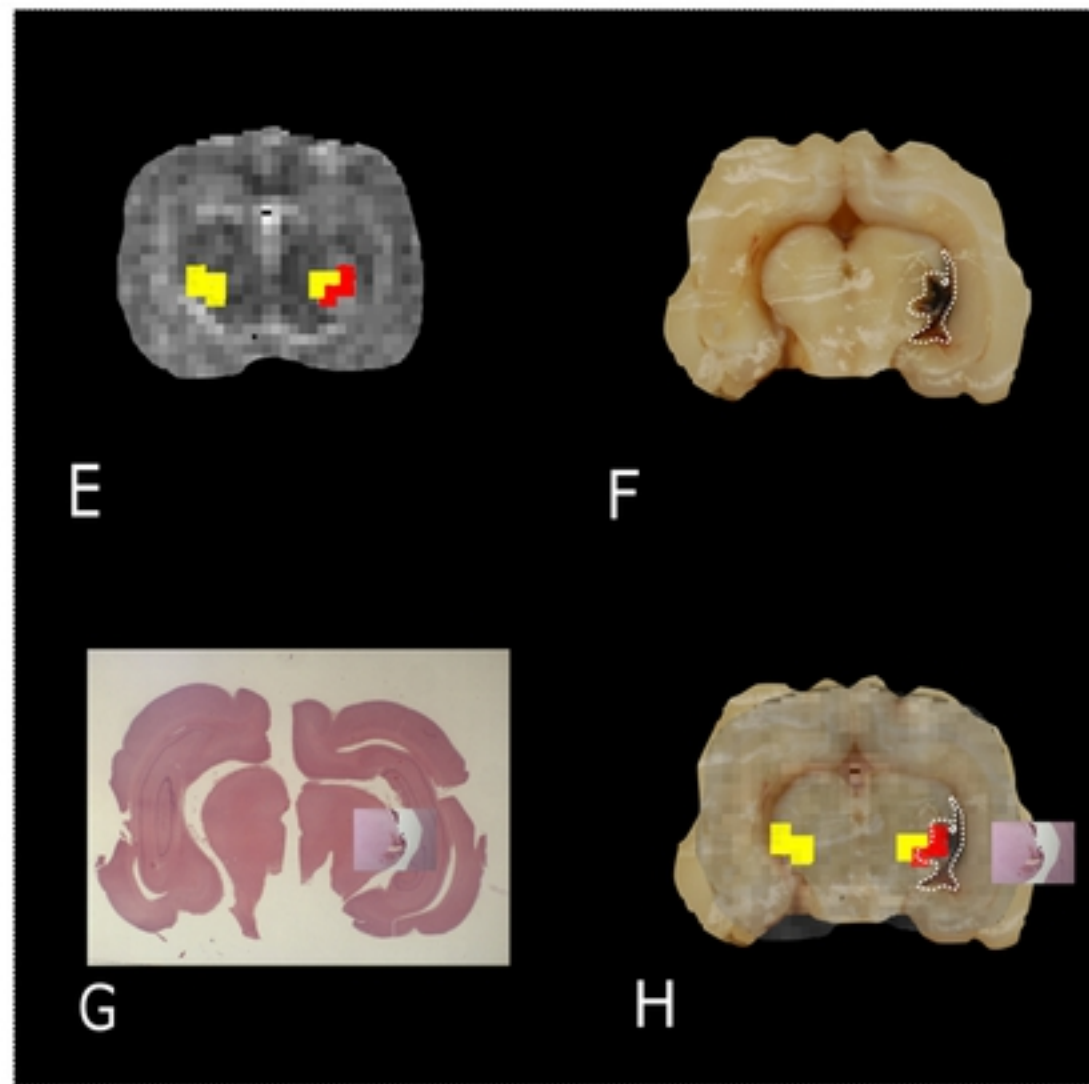

Figure 5

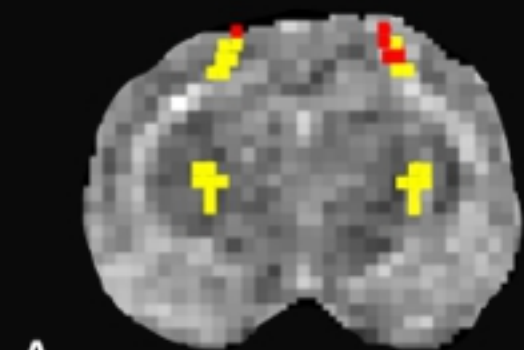

A

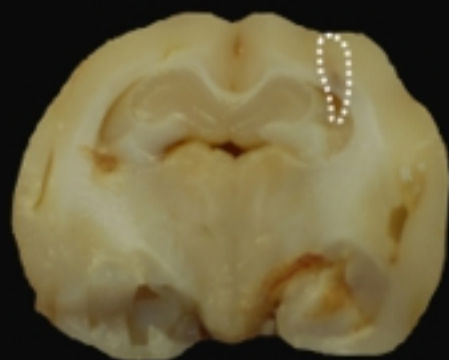

B

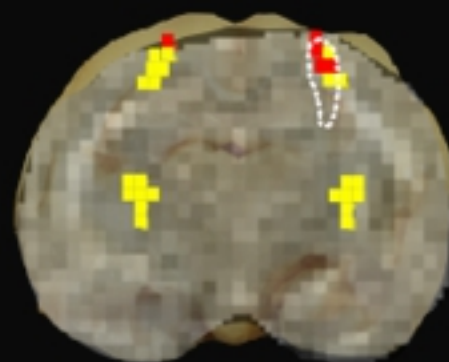

C

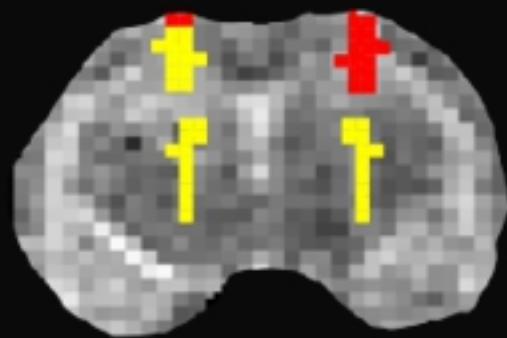

D

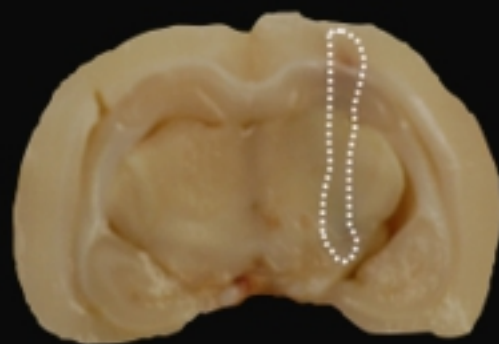

E

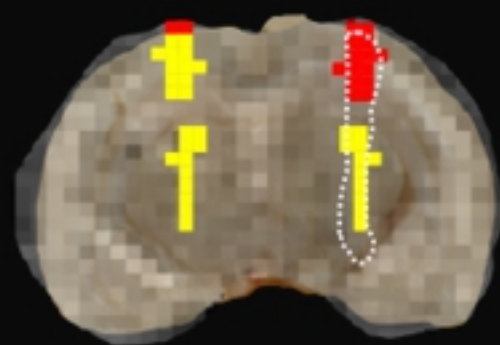

F

Figure 6



bioRxiv preprint doi: <https://doi.org/10.1101/2021.01.12.426333>; this version posted January 12, 2021. The copyright holder for this preprint (which was not certified by peer review) is the author/funder, who has granted bioRxiv a license to display the preprint in perpetuity. It is made available under aCC-BY 4.0 International license.

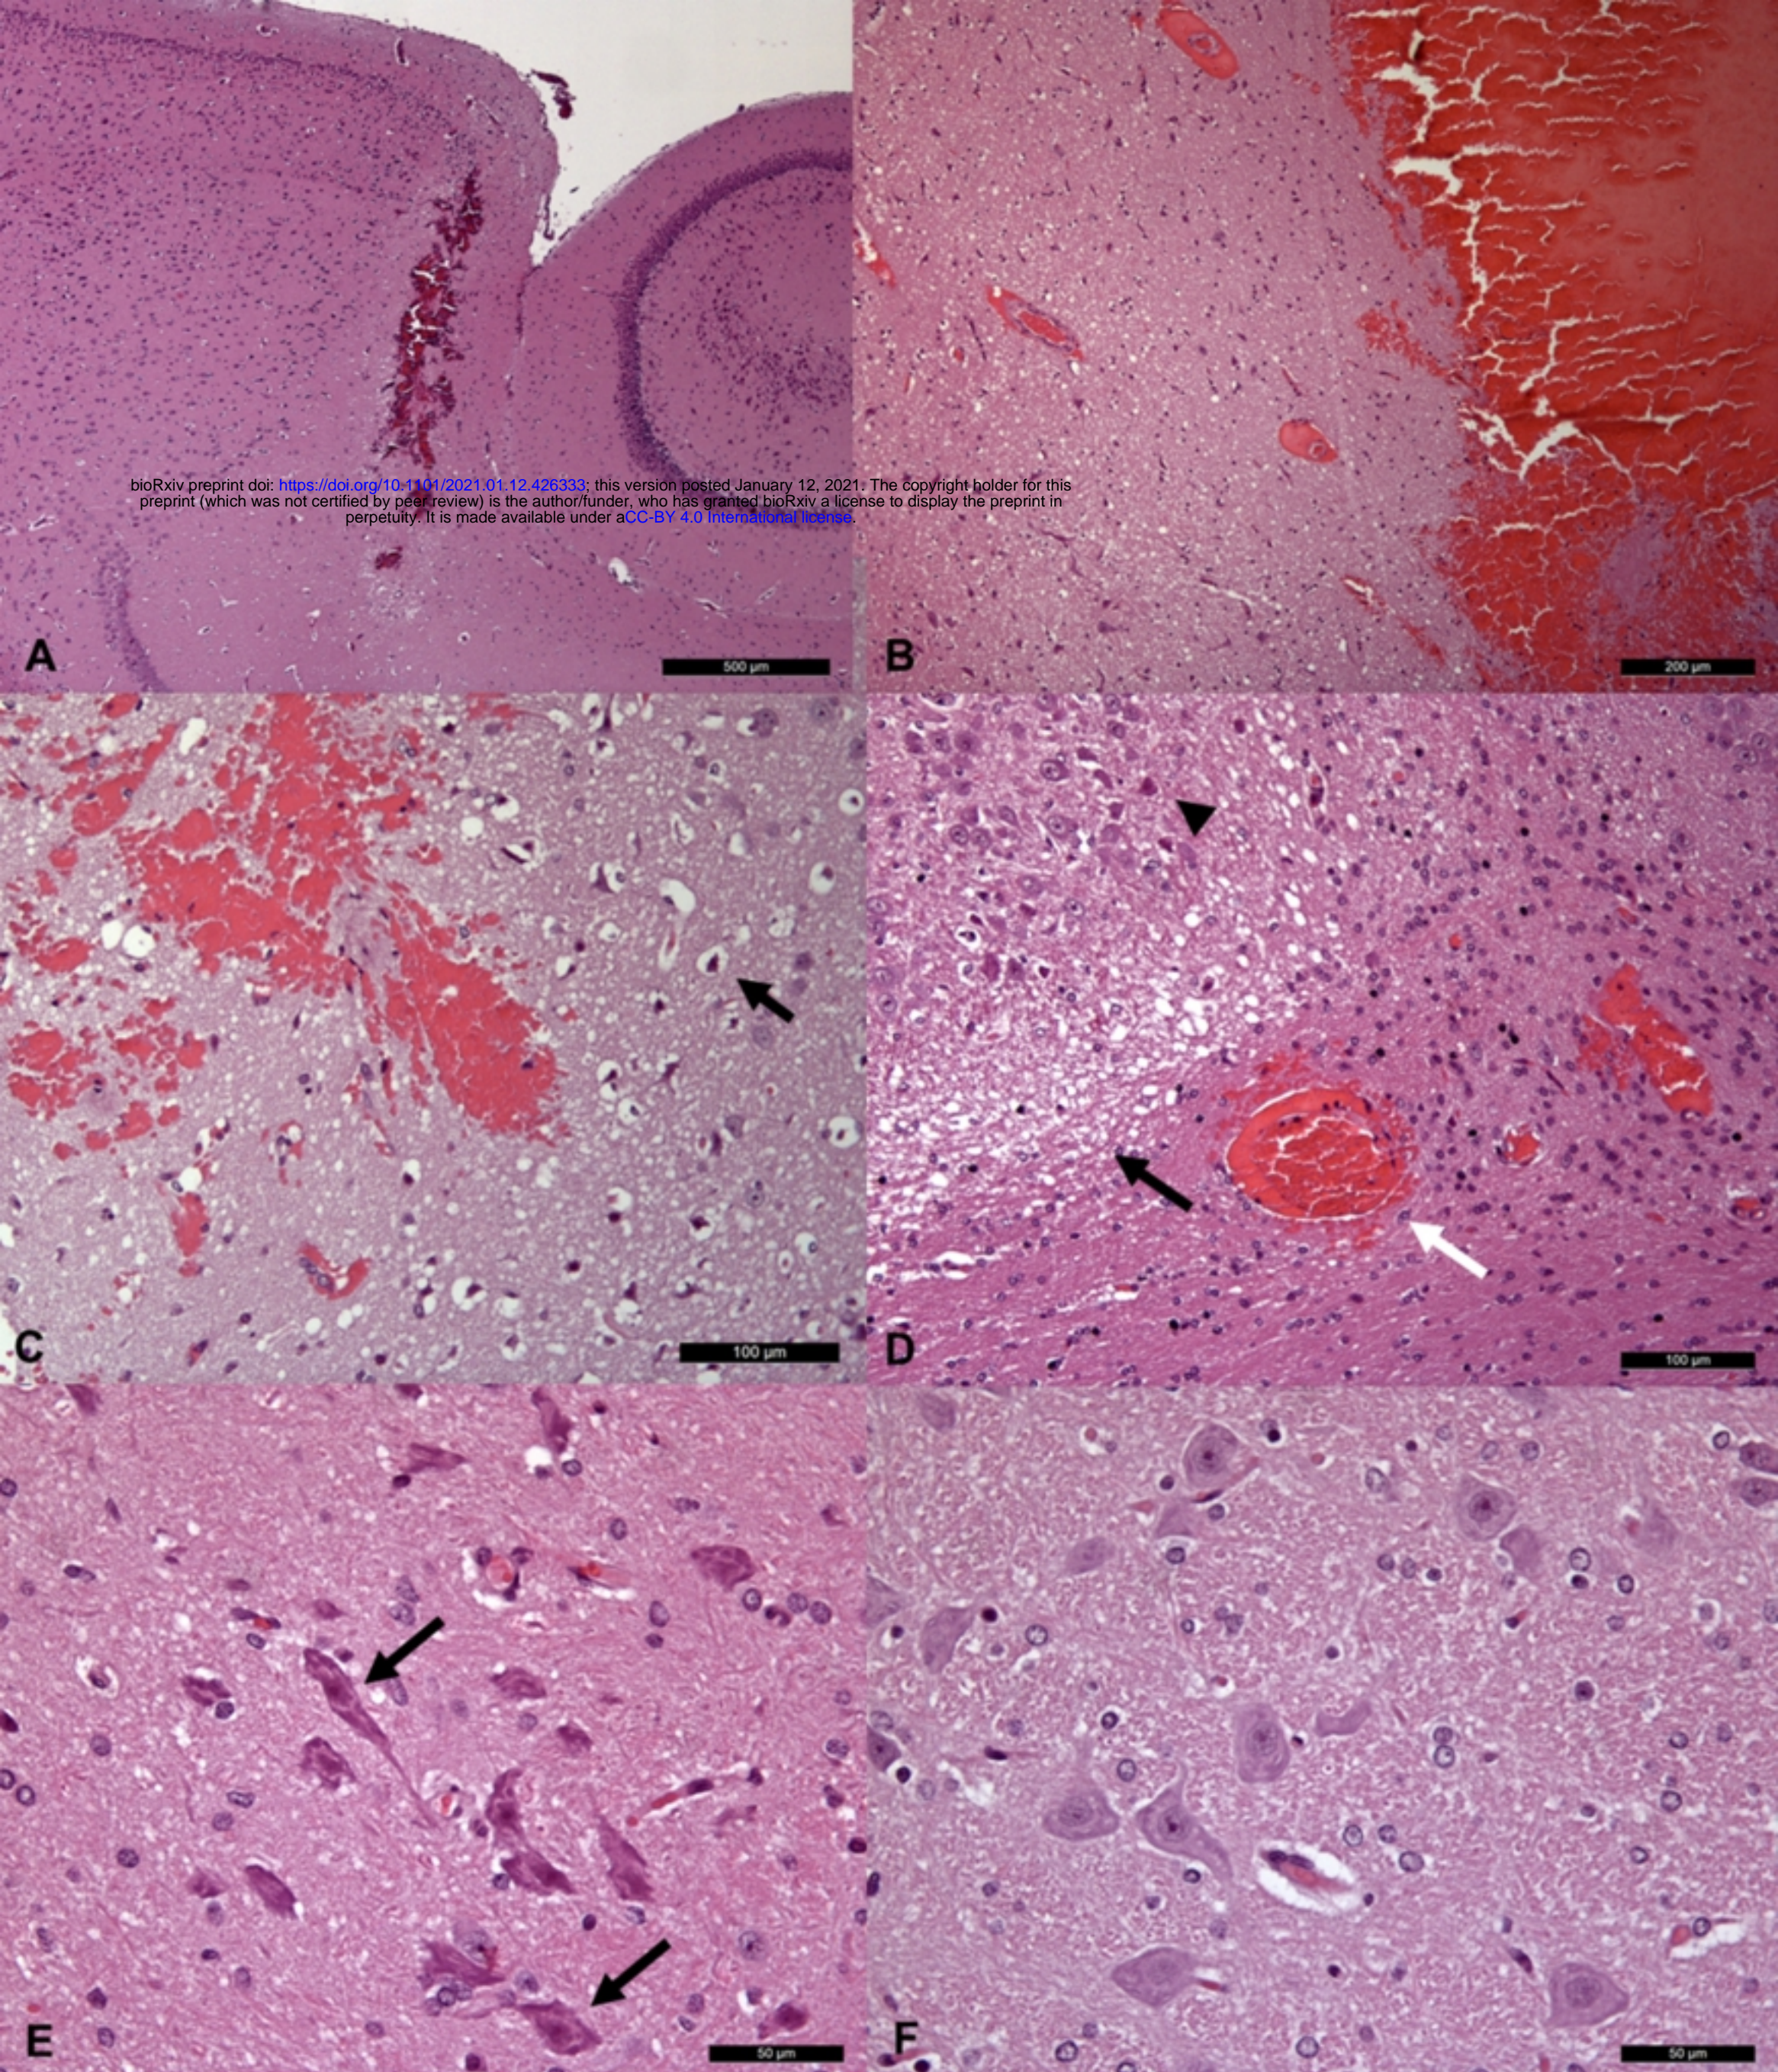

Figure 7



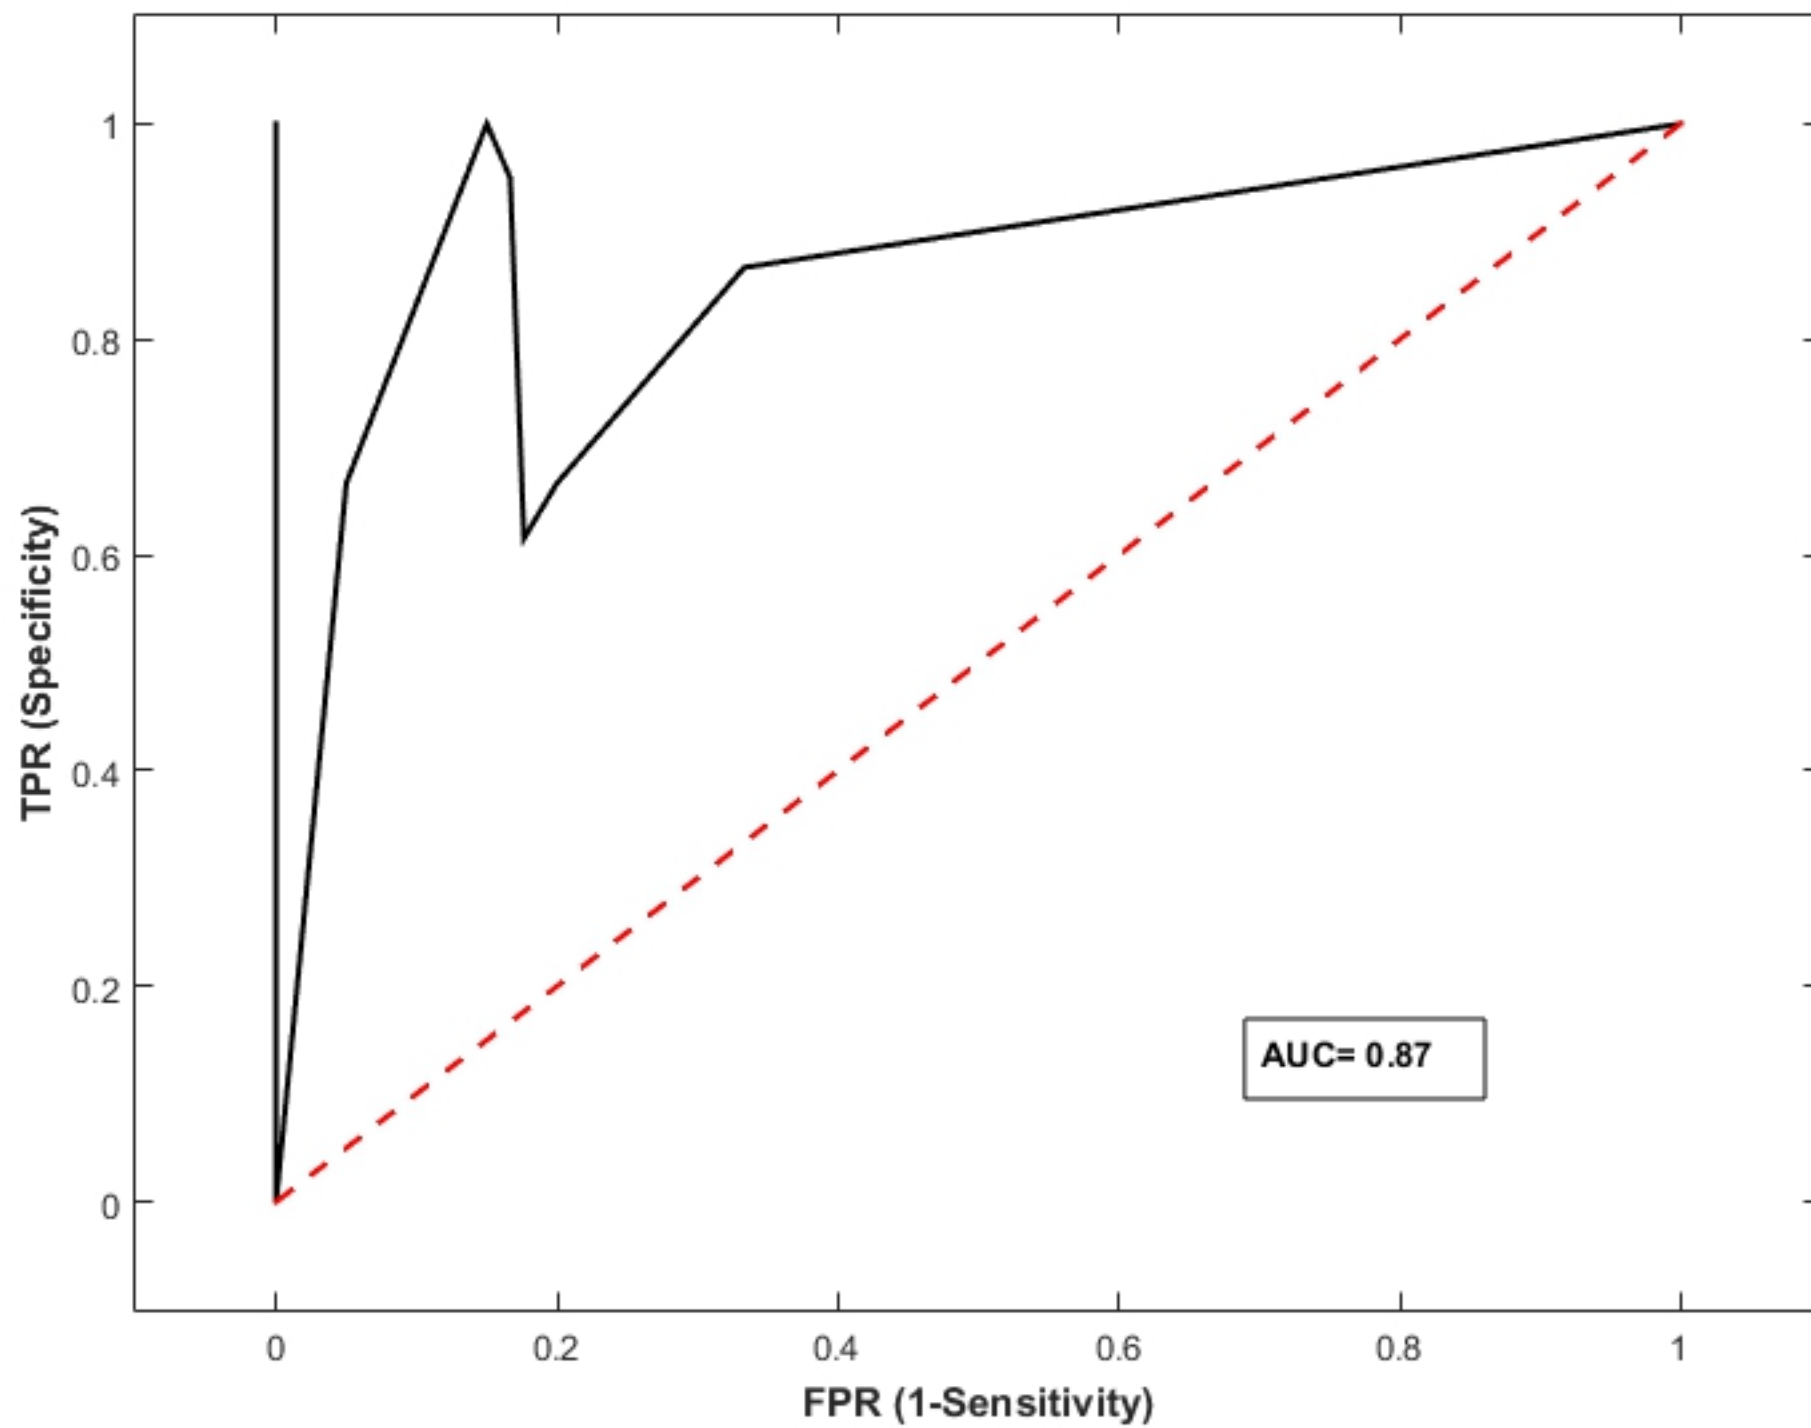

Figure 8
